# Supplementary material for: The mechanism and kinetic studies on oxidation reaction of acetofenate initiated by HOx, NO3, O3, and Cl radicals
Source: Royal Society of Chemistry journal article supplement (doi:10.1039/c5ra11453e), 2015-01-01
Supplement: c5ra11453e1.pdf [file c5ra11453e1.pdf]

## Supporting Information for

### The Mechanism and Kinetic Studies on Oxidation Reaction of Acetofenate Initiated by HO<sub>x</sub>, NO<sub>3</sub>, O<sub>3</sub>, and Cl Radical

Lingyan Kang<sup>a</sup>, Chenxi Zhang<sup>b</sup>, Xiaomin Sun<sup>a\*</sup>

<sup>a</sup> Environment Research Institute, Shandong University, Jinan 250100, P. R. China

<sup>b</sup> Department of Resource and Environment, Binzhou University, Binzhou 256600,  
PR China

#### Figure and Table Captions

**Figure S1** OH radical-initiated *trans*-addition pathways with the potential barriers  $\Delta E_b$  and reaction heats  $\Delta E_r$  (kcal/mol)

**Figure S2** OH initiated H atom abstraction pathways with the potential barriers  $\Delta E_b$  and reaction heats  $\Delta E_r$  (kcal/mol)

**Figure S3** HO<sub>2</sub> radical-initiated *cis*-addition pathways pathways with the potential barriers  $\Delta E_b$  and reaction heats  $\Delta E_r$  (kcal/mol)

**Figure S4** NO<sub>3</sub> radical-initiated *cis*-addition pathways pathways with the potential barriers  $\Delta E_b$  and reaction heats  $\Delta E_r$  (kcal/mol)

**Figure S5** O<sub>3</sub> initiated *cis*-addition pathways pathways with the potential barriers  $\Delta E_b$  and reaction heats  $\Delta E_r$  (kcal/mol)

**Figure S6** Cl radical-initiated *trans*-addition pathways pathways with the potential barriers  $\Delta E_b$  and reaction heats  $\Delta E_r$  (kcal/mol)

**Figure S7** The ratio of the rate constants for addition and abstraction reactions to the total rate constant of AF with OH

**Figure S8** The ratio of the rate constants for addition and abstraction reactions to the total rate constant of AF with  $\text{NO}_3$

**Figure S9** The ratio of the rate constants for addition and abstraction reactions to the total rate constant of AF with Cl

**Figure S10** The rate branching ratio of each initiated reactions to the total rate from 200 to 400K

**Table S1A** The rate constants of addition reactions of AF with OH at 200-400K (unit:  $\text{cm}^3\text{molecule}^{-1}\text{s}^{-1}$ )

**Table S2A** The rate constants of abstraction reactions of AF with OH reactions at 200-400K (unit:  $\text{cm}^3\text{molecule}^{-1}\text{s}^{-1}$ )

**Table S3A** The rate constants of AF with  $\text{HO}_2$  reactions at 200-400K (unit:  $\text{cm}^3\text{molecule}^{-1}\text{s}^{-1}$ )

**Table S4A** The rate constants of addition reactions of AF with  $\text{NO}_3$  at 200-400K (unit:  $\text{cm}^3\text{molecule}^{-1}\text{s}^{-1}$ )

**Table S5A** The rate constants of abstraction reactions of AF with  $\text{NO}_3$  reactions at 200-400K (unit:  $\text{cm}^3\text{molecule}^{-1}\text{s}^{-1}$ )

**Table S6A** The rate constants of AF with  $\text{O}_3$  reactions at 200-400K (unit:  $\text{cm}^3\text{molecule}^{-1}\text{s}^{-1}$ )

**Table S7A** The rate constants of addition reactions of AF with Cl at 200-400K (unit:  $\text{cm}^3\text{molecule}^{-1}\text{s}^{-1}$ )

**Table S8A** The rate constants of abstraction reactions of AF with Cl reactions at 200-400K (unit:  $\text{cm}^3\text{molecule}^{-1}\text{s}^{-1}$ )

**Table S1B** Arrhenius formulas for elementary reactions of AF with OH over the temperature range of 200-400 K (unit:  $\text{cm}^3\text{molecule}^{-1}\text{s}^{-1}$ )

**Table S2B** Arrhenius formulas for elementary reactions of AF with  $\text{HO}_2$  over the temperature range of 200-400 K (unit:  $\text{cm}^3\text{molecule}^{-1}\text{s}^{-1}$ )

**Table S3B** Arrhenius formulas for elementary reactions of AF with  $\text{NO}_3$  over the temperature range of 200-400 K (unit:  $\text{cm}^3\text{molecule}^{-1}\text{s}^{-1}$ )

**Table S4B** Arrhenius formulas for elementary reactions of AF with  $\text{O}_3$  over the temperature range of 200-400 K (unit:  $\text{cm}^3\text{molecule}^{-1}\text{s}^{-1}$ )

**Table S5B** Arrhenius formulas for elementary reactions of AF with Cl over the temperature range of 200-400 K (unit:  $\text{cm}^3\text{molecule}^{-1}\text{s}^{-1}$ )

**Table S1C** The lifetimes of AF + OH addition reactions according to the rate constants at 200-400K

**Table S1C** The lifetimes of AF + OH abstraction reactions according to the rate constants at 200-400K

**Table S3C** The lifetimes of AF +  $\text{HO}_2$  according to the rate constants at 200-400K

**Table S4C** The lifetimes of AF +  $\text{NO}_3$  addition reactions according to the rate constants at 200-400K

**Table S5C** The lifetimes of AF + NO<sub>3</sub> abstraction reactions according to the rate constants at 200-400K

**Table S6C** The lifetimes of AF + O<sub>3</sub> according to the rate constants at 200-400K

**Table S75C** The lifetimes of AF + Cl addition reactions according to the rate constants at 200-400K

**Table S8C** The lifetimes of AF + Cl abstraction reactions according to the rate constants at 200-400K

**Table SD** The total lifetimes of AF with different oxidants according to the rate constants at 200-400K

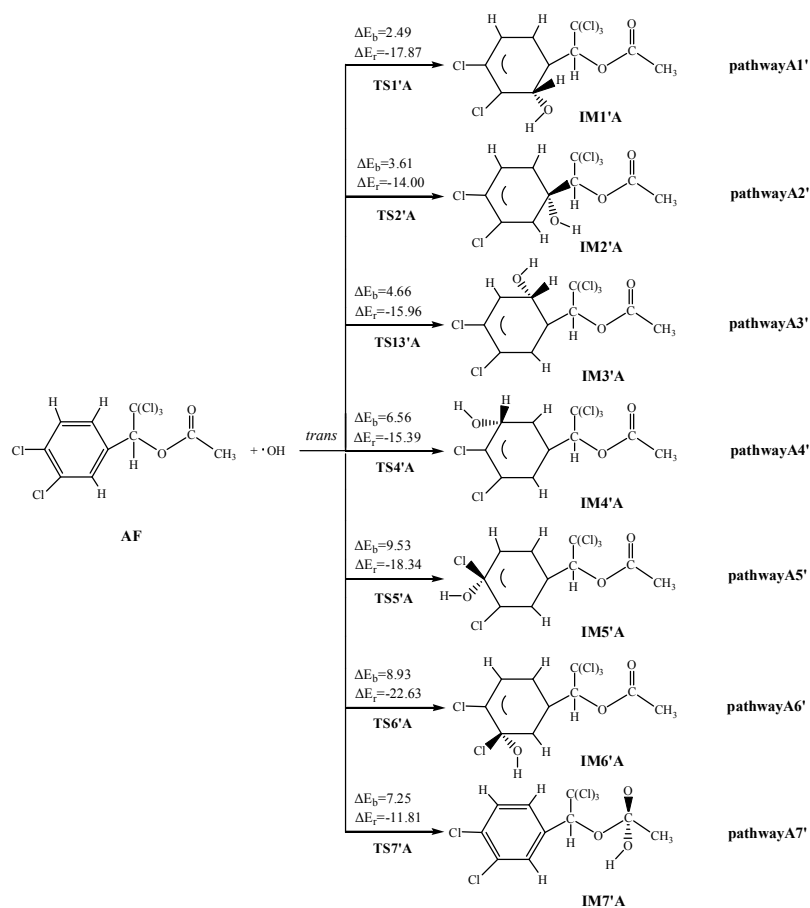

**Figure S1** OH radical-initiated *trans*-addition pathways with the potential barriers

$\Delta E_b$  and reaction heats  $\Delta E_r$  (kcal/mol)

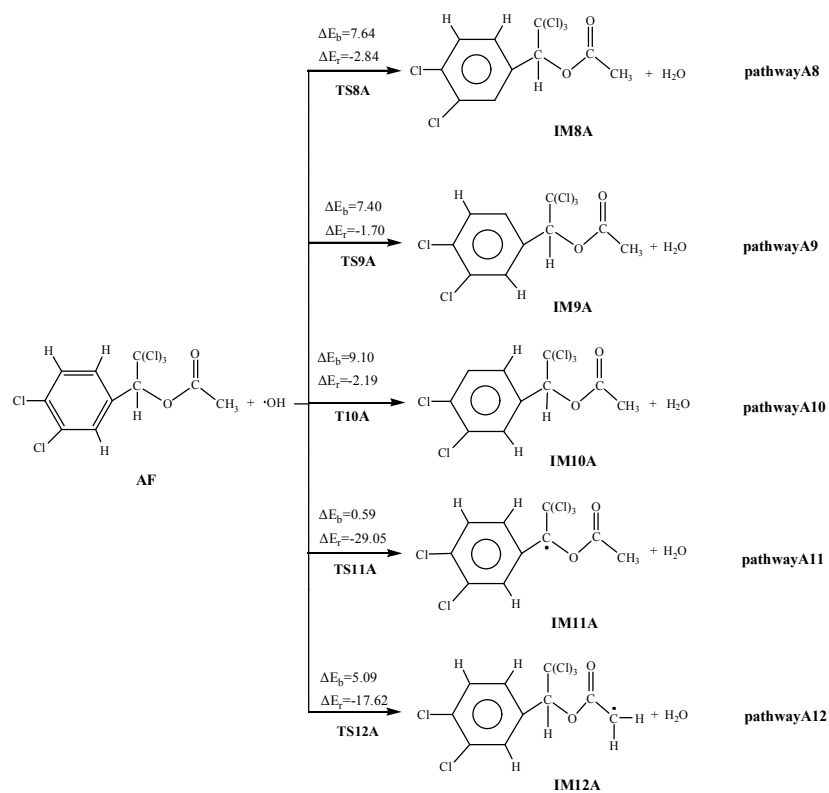

**Figure S2** OH initiated H atom abstraction pathways with the potential barriers  $\Delta E_b$  and reaction heats  $\Delta E_r$  (kcal/mol)

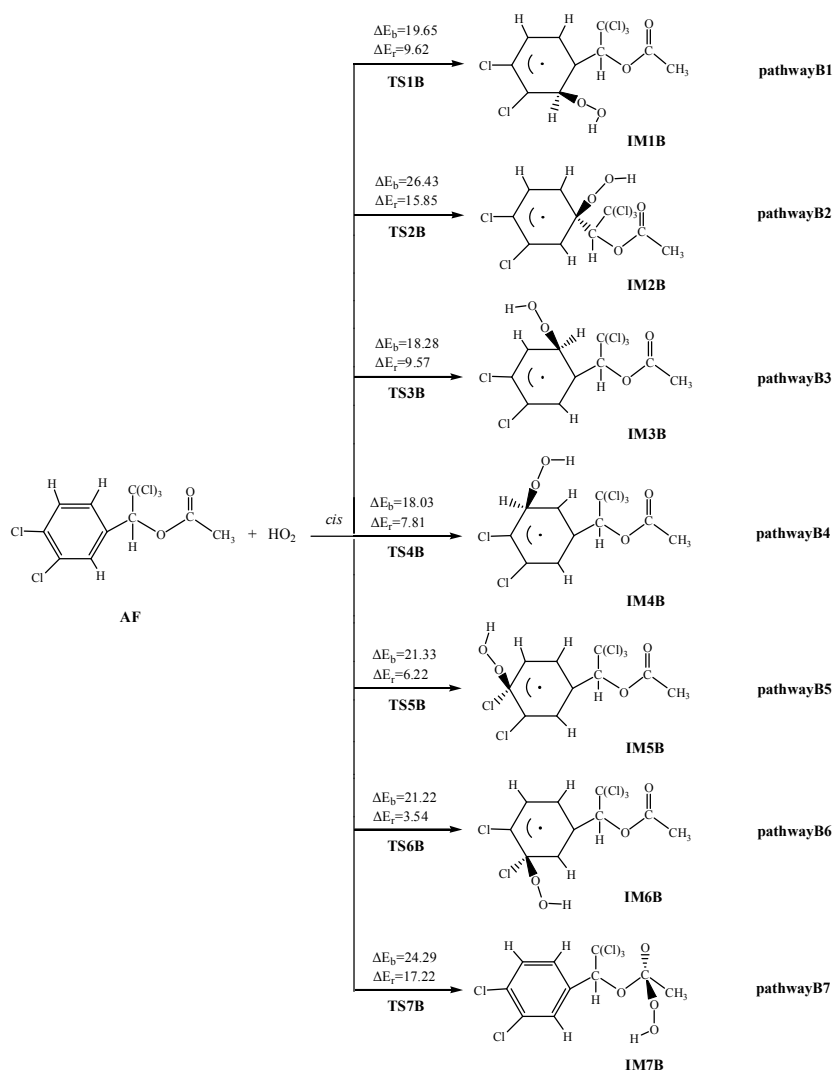

**Figure S3**  $\text{HO}_2$  radical-initiated *cis*-addition pathways with the potential barriers  $\Delta E_b$  and reaction heats  $\Delta E_r$  (kcal/mol)

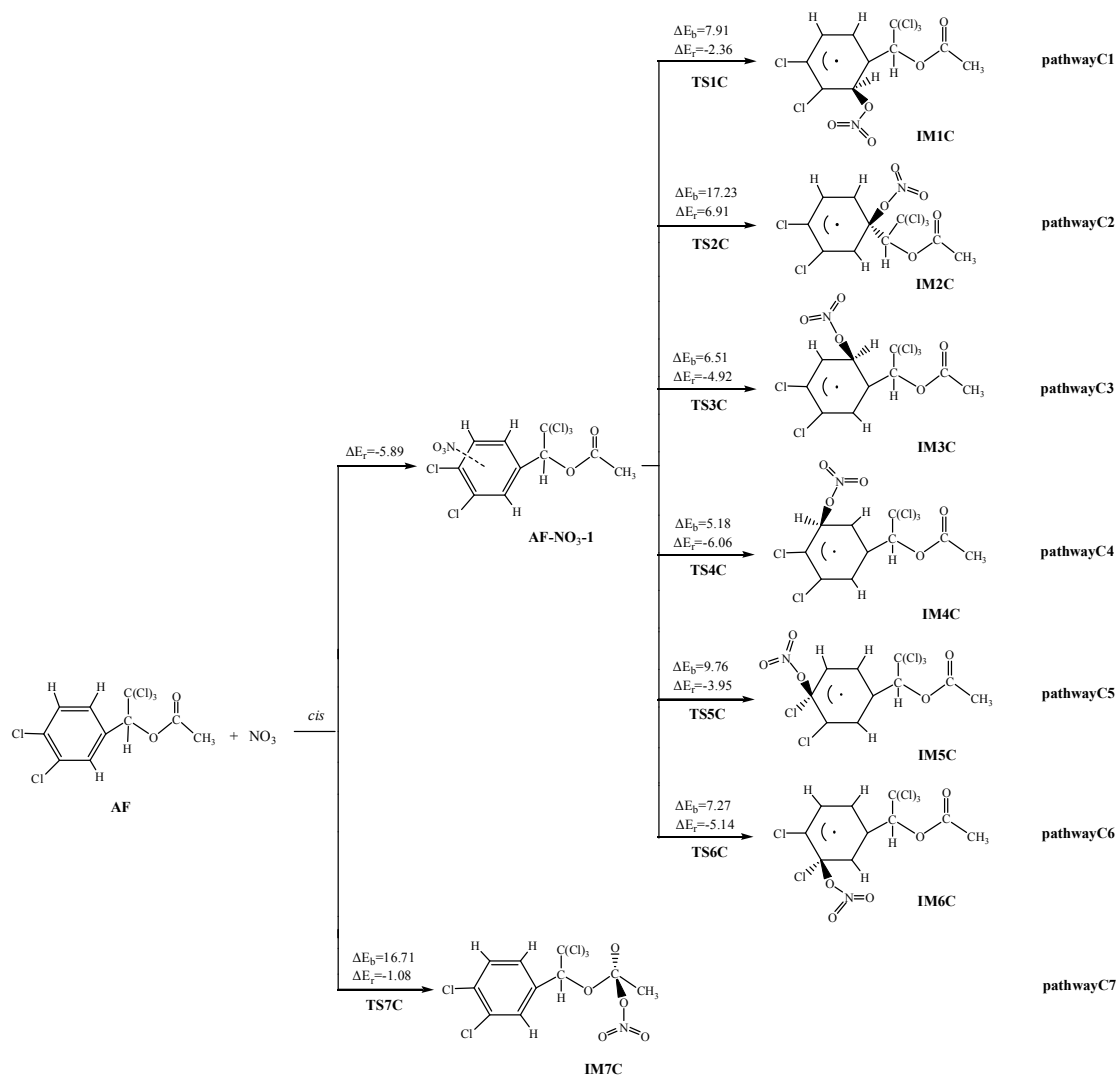

**Figure S4**  $\text{NO}_3$  radical-initiated *cis*-addition pathways with the potential barriers  $\Delta E_b$  and reaction heats  $\Delta E_r$  (kcal/mol)



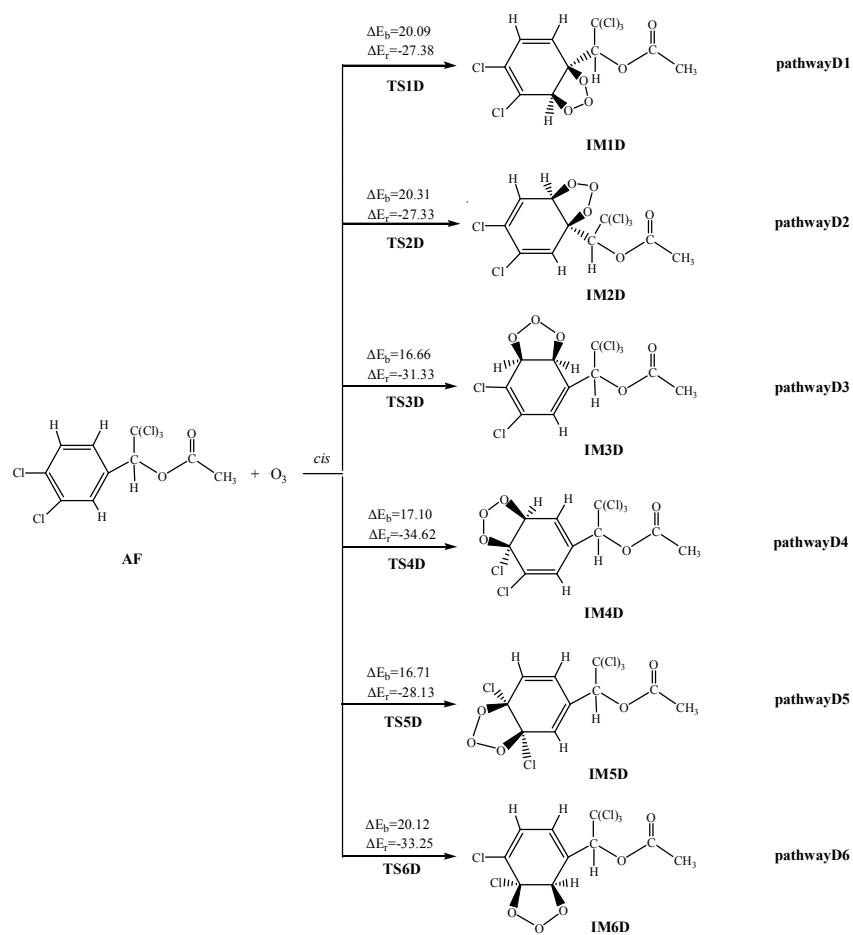

**Figure S5**  $O_3$  initiated *cis*-addition pathways pathways with the potential barriers  $\Delta E_b$  and reaction heats  $\Delta E_r$  (kcal/mol)

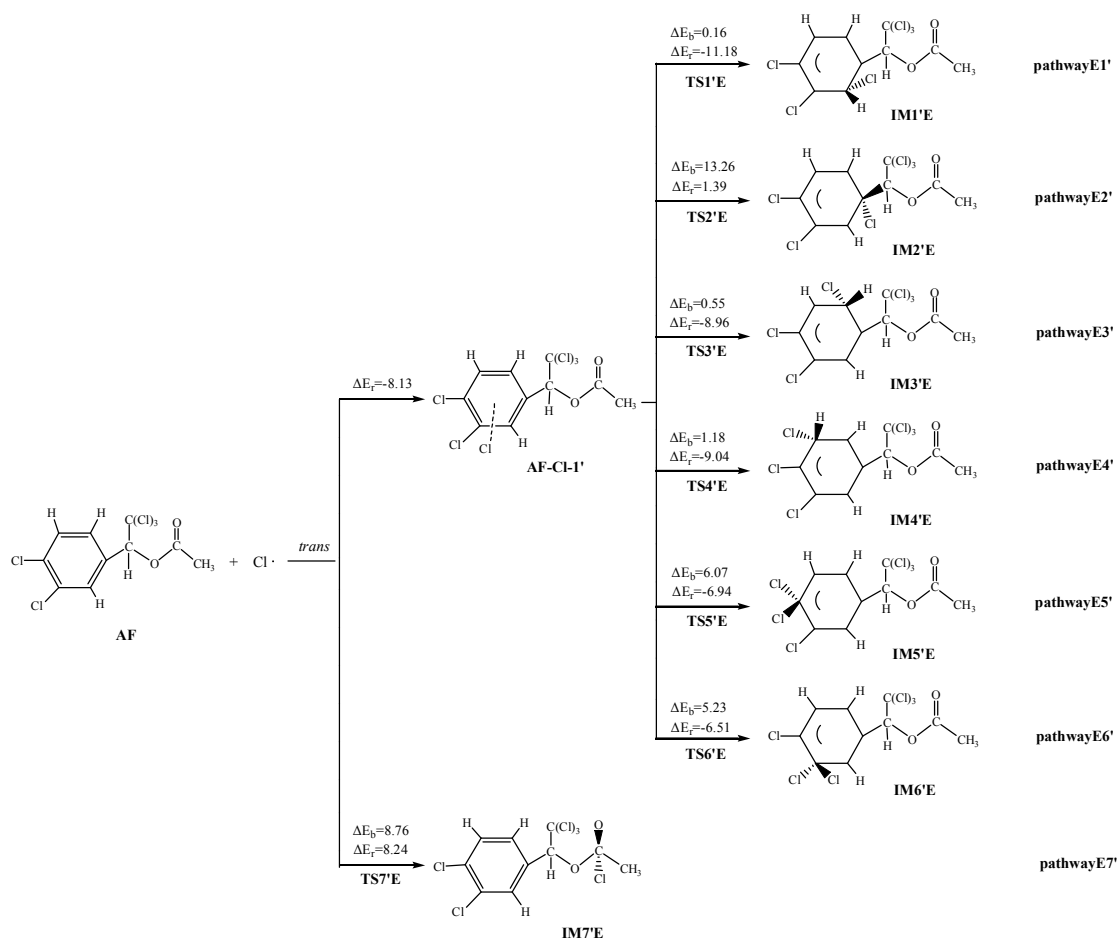

**Figure S6** Cl radical-initiated *trans*-addition pathways with the potential barriers  $\Delta E_b$  and reaction heats  $\Delta E_r$  (kcal/mol)

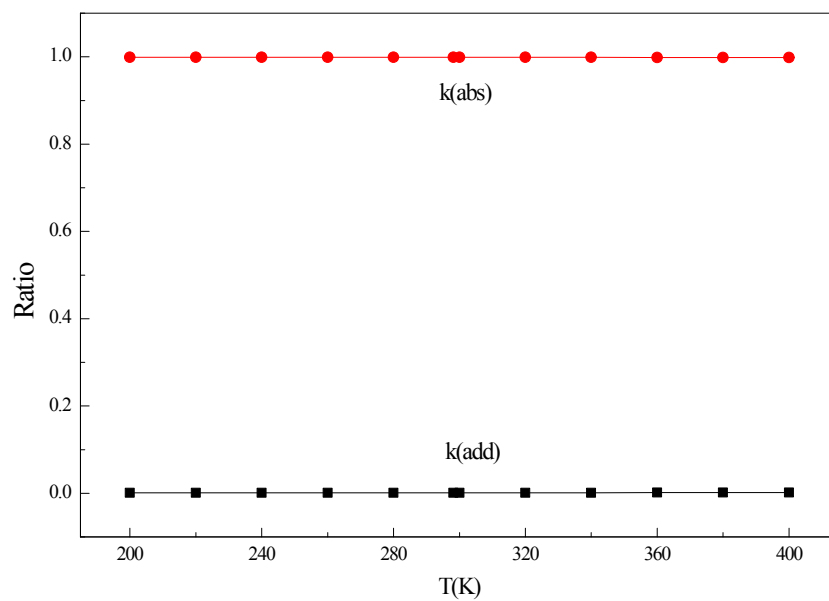

**Figure S7** The ratio of the rate constants for addition and abstraction reactions to the total rate constant of AF with OH

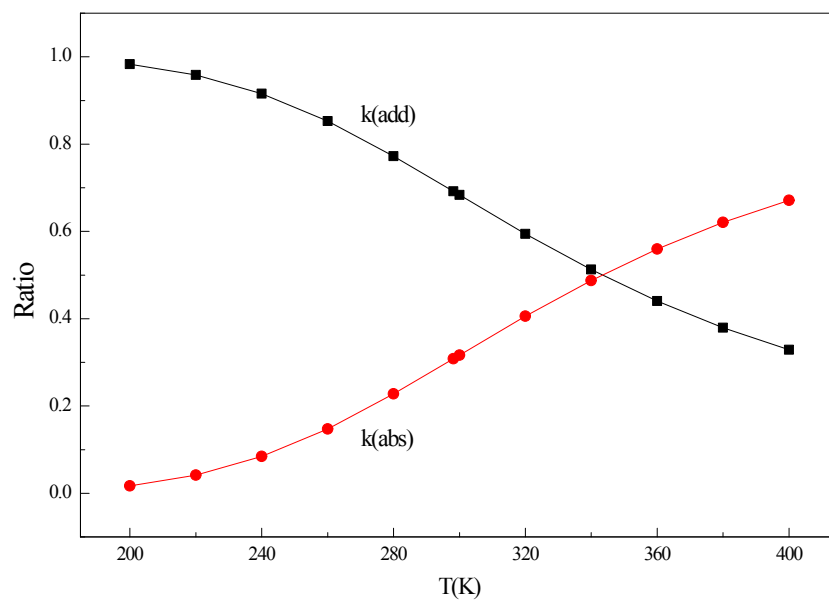

**Figure S8** The ratio of the rate constants for addition and abstraction reactions to the total rate constant of AF with NO<sub>3</sub>

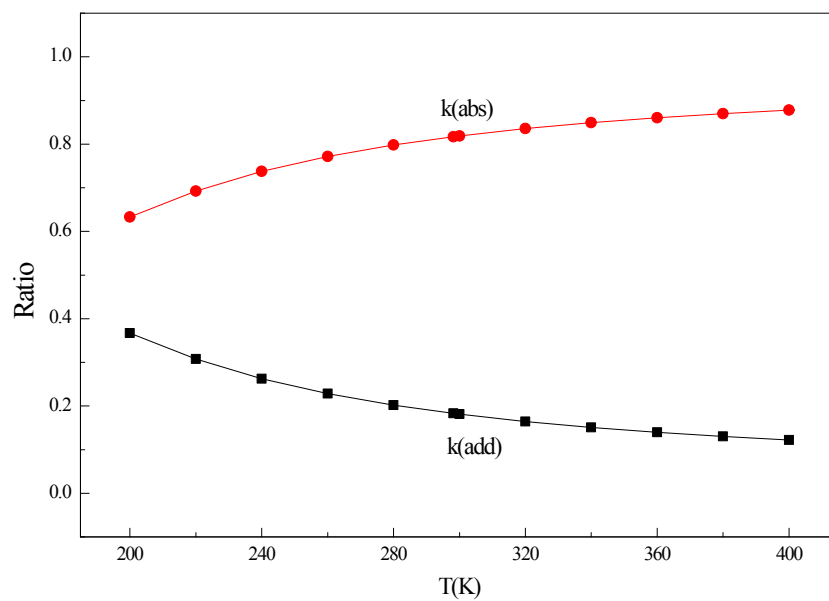

**Figure S9** The ratio of the rate constants for addition and abstraction reactions to the total rate constant of AF with Cl

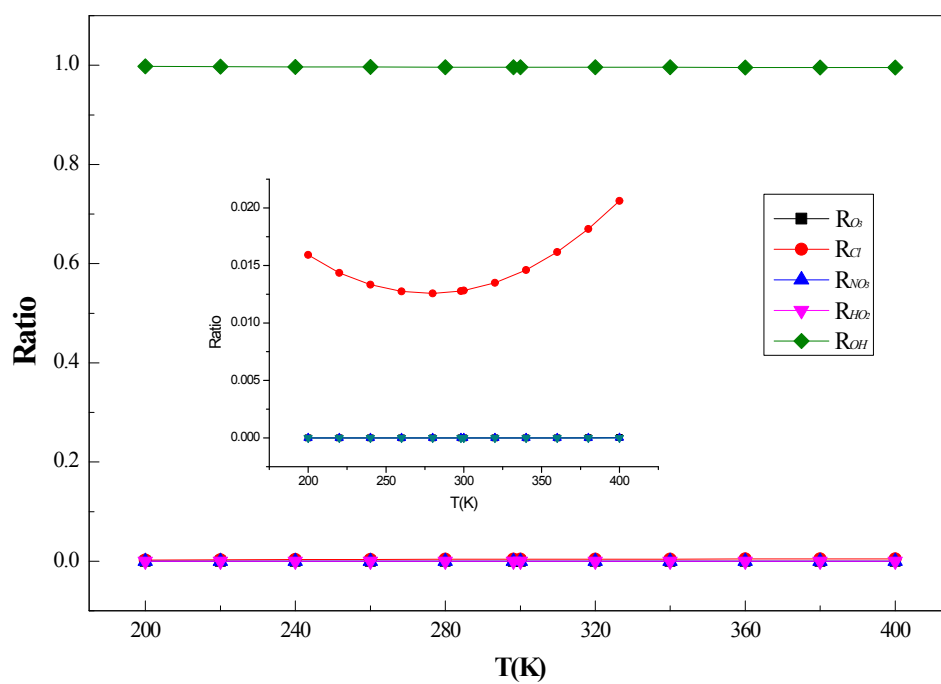

**Figure S10** The rate branching ratio of each initiated reactions to the total rate from 200 to 400K

**Table S1A** The rate constants of addition reactions of AF with OH at 200-400K (unit: cm<sup>3</sup>molecule<sup>-1</sup>s<sup>-1</sup>)

| T(K)          | k <sub>1</sub>  | k <sub>2</sub>  | k <sub>3</sub>  | k <sub>4</sub>  | k <sub>5</sub>  | k <sub>6</sub>  | k <sub>7</sub>  | k <sub>1'</sub> | k <sub>2'</sub> | k <sub>3'</sub> | k <sub>4'</sub> | k <sub>5'</sub> | k <sub>6'</sub> | k <sub>7'</sub> |
|---------------|-----------------|-----------------|-----------------|-----------------|-----------------|-----------------|-----------------|-----------------|-----------------|-----------------|-----------------|-----------------|-----------------|-----------------|
| 200           | 3.12E-20        | 5.71E-26        | 5.50E-19        | 8.21E-24        | 4.74E-19        | 5.21E-19        | 1.04E-23        | 1.91E-18        | 1.21E-19        | 3.08E-20        | 8.88E-22        | 7.92E-25        | 1.02E-24        | 1.04E-23        |
| 220           | 9.58E-20        | 6.72E-25        | 1.55E-18        | 6.75E-23        | 1.59E-18        | 1.62E-18        | 6.62E-23        | 4.08E-18        | 3.35E-19        | 1.08E-19        | 4.82E-21        | 8.49E-24        | 9.49E-24        | 6.64E-23        |
| 240           | 2.48E-19        | 5.32E-24        | 3.74E-18        | 3.97E-22        | 4.42E-18        | 4.23E-18        | 3.14E-22        | 7.82E-18        | 7.94E-19        | 3.14E-19        | 2.00E-20        | 6.22E-23        | 6.20E-23        | 3.15E-22        |
| 260           | 5.62E-19        | 3.11E-23        | 7.97E-18        | 1.80E-21        | 1.06E-17        | 9.67E-18        | 1.19E-21        | 1.37E-17        | 1.67E-18        | 7.82E-19        | 6.77E-20        | 3.40E-22        | 3.08E-22        | 1.19E-21        |
| 280           | 1.14E-18        | 1.42E-22        | 1.54E-17        | 6.64E-21        | 2.28E-17        | 1.98E-17        | 3.76E-21        | 2.25E-17        | 3.19E-18        | 1.73E-18        | 1.94E-19        | 1.47E-21        | 1.23E-21        | 3.77E-21        |
| <b>298.15</b> | <b>2.03E-18</b> | <b>4.79E-22</b> | <b>2.62E-17</b> | <b>1.88E-20</b> | <b>4.21E-17</b> | <b>3.53E-17</b> | <b>9.43E-21</b> | <b>3.35E-17</b> | <b>5.37E-18</b> | <b>3.27E-18</b> | <b>4.52E-19</b> | <b>4.74E-21</b> | <b>3.70E-21</b> | <b>9.46E-21</b> |
| 300           | 2.14E-18        | 5.38E-22        | 2.76E-17        | 2.08E-20        | 4.47E-17        | 3.73E-17        | 1.03E-20        | 3.48E-17        | 5.65E-18        | 3.47E-18        | 4.90E-19        | 5.30E-21        | 4.11E-21        | 1.03E-20        |
| 320           | 3.73E-18        | 1.74E-21        | 4.63E-17        | 5.70E-20        | 8.10E-17        | 6.55E-17        | 2.51E-20        | 5.14E-17        | 9.38E-18        | 6.44E-18        | 1.11E-18        | 1.64E-20        | 1.19E-20        | 2.52E-20        |
| 340           | 6.15E-18        | 4.92E-21        | 7.36E-17        | 1.40E-19        | 1.38E-16        | 1.08E-16        | 5.54E-20        | 7.30E-17        | 1.48E-17        | 1.12E-17        | 2.30E-18        | 4.47E-20        | 3.08E-20        | 5.56E-20        |
| 360           | 9.63E-18        | 1.25E-20        | 1.12E-16        | 3.12E-19        | 2.23E-16        | 1.70E-16        | 1.13E-19        | 1.01E-16        | 2.23E-17        | 1.84E-17        | 4.42E-18        | 1.10E-19        | 7.19E-20        | 1.13E-19        |
| 380           | 1.45E-17        | 2.89E-20        | 1.64E-16        | 6.43E-19        | 3.45E-16        | 2.57E-16        | 2.14E-19        | 1.35E-16        | 3.24E-17        | 2.90E-17        | 7.97E-18        | 2.47E-19        | 1.55E-19        | 2.15E-19        |
| 400           | 2.10E-17        | 6.19E-20        | 2.32E-16        | 1.24E-18        | 5.14E-16        | 3.75E-16        | 3.84E-19        | 1.76E-16        | 4.57E-17        | 4.37E-17        | 1.36E-17        | 5.14E-19        | 3.09E-19        | 3.85E-19        |

**Table S2A** The rate constants of abstraction reactions of AF with OH reactions at 200-400K (unit: cm<sup>3</sup>molecule<sup>-1</sup>s<sup>-1</sup>)

| T(K)          | k <sub>8</sub>  | k <sub>9</sub>  | k <sub>10</sub> | k <sub>11</sub> | k <sub>12</sub> |
|---------------|-----------------|-----------------|-----------------|-----------------|-----------------|
| 200           | 6.29E-21        | 1.66E-20        | 2.12E-21        | 1.11E-13        | 1.52E-17        |
| 220           | 4.38E-20        | 1.09E-19        | 2.06E-20        | 1.54E-13        | 5.91E-17        |
| 240           | 2.24E-19        | 5.34E-19        | 1.39E-19        | 2.05E-13        | 1.86E-16        |
| 260           | 9.02E-19        | 2.07E-18        | 7.09E-19        | 2.64E-13        | 4.96E-16        |
| 280           | 3.01E-18        | 6.68E-18        | 2.90E-18        | 3.32E-13        | 1.16E-15        |
| <b>298.15</b> | <b>7.88E-18</b> | <b>1.70E-17</b> | <b>8.90E-18</b> | <b>4.01E-13</b> | <b>2.30E-15</b> |
| 300           | 8.64E-18        | 1.86E-17        | 9.91E-18        | 4.09E-13        | 2.46E-15        |
| 320           | 2.19E-17        | 4.61E-17        | 2.93E-17        | 4.94E-13        | 4.77E-15        |
| 340           | 5.02E-17        | 1.03E-16        | 7.68E-17        | 5.89E-13        | 8.63E-15        |
| 360           | 1.05E-16        | 2.13E-16        | 1.82E-16        | 6.93E-13        | 1.47E-14        |
| 380           | 2.06E-16        | 4.09E-16        | 3.97E-16        | 8.06E-13        | 2.38E-14        |
| 400           | 3.79E-16        | 7.39E-16        | 8.03E-16        | 9.29E-13        | 3.70E-14        |



**Table S3A** The rate constants of AF with HO<sub>2</sub> reactions at 200-400K (unit: cm<sup>3</sup>molecule<sup>-1</sup>s<sup>-1</sup>)

| T(K)          | k <sub>1</sub>  | k <sub>2</sub>  | k <sub>3</sub>  | k <sub>4</sub>  | k <sub>5</sub>  | k <sub>6</sub>  | k <sub>7</sub>  | k <sub>1'</sub> | k <sub>2'</sub> | k <sub>3'</sub> | k <sub>4'</sub> | k <sub>5'</sub> | k <sub>6'</sub> | k <sub>7'</sub> |
|---------------|-----------------|-----------------|-----------------|-----------------|-----------------|-----------------|-----------------|-----------------|-----------------|-----------------|-----------------|-----------------|-----------------|-----------------|
| 200           | 5.89E-38        | 4.12E-46        | 7.21E-37        | 1.50E-36        | 2.67E-39        | 9.85E-40        | 4.95E-44        | 5.55E-33        | 2.22E-36        | 1.43E-33        | 2.58E-35        | 7.84E-41        | 1.86E-39        | 2.91E-44        |
| 220           | 6.40E-36        | 2.11E-43        | 5.73E-35        | 1.12E-34        | 4.27E-37        | 1.53E-37        | 1.56E-41        | 2.02E-31        | 1.51E-34        | 5.81E-32        | 1.59E-33        | 1.64E-38        | 2.46E-37        | 1.11E-41        |
| 240           | 3.23E-34        | 3.89E-41        | 2.23E-33        | 4.16E-33        | 2.97E-35        | 1.04E-35        | 1.90E-39        | 4.08E-30        | 5.19E-33        | 1.29E-30        | 4.99E-32        | 1.42E-36        | 1.47E-35        | 1.61E-39        |
| 260           | 9.05E-33        | 3.26E-39        | 5.00E-32        | 8.96E-32        | 1.09E-33        | 3.76E-34        | 1.13E-37        | 5.27E-29        | 1.04E-31        | 1.80E-29        | 9.35E-31        | 6.31E-35        | 4.71E-34        | 1.10E-37        |
| 280           | 1.59E-31        | 1.46E-37        | 7.28E-31        | 1.26E-30        | 2.41E-32        | 8.22E-33        | 3.76E-36        | 4.77E-28        | 1.39E-30        | 1.75E-28        | 1.17E-29        | 1.64E-33        | 9.33E-33        | 4.13E-36        |
| <b>298.15</b> | <b>1.55E-30</b> | <b>3.00E-36</b> | <b>6.11E-30</b> | <b>1.03E-29</b> | <b>2.83E-31</b> | <b>9.52E-32</b> | <b>6.10E-35</b> | <b>2.75E-27</b> | <b>1.08E-29</b> | <b>1.06E-27</b> | <b>8.66E-29</b> | <b>2.19E-32</b> | <b>9.99E-32</b> | <b>7.36E-35</b> |
| 300           | 1.93E-30        | 3.99E-36        | 7.48E-30        | 1.25E-29        | 3.57E-31        | 1.20E-31        | 7.95E-35        | 3.25E-27        | 1.31E-29        | 1.26E-27        | 1.05E-28        | 2.80E-32        | 1.25E-31        | 9.68E-35        |
| 320           | 1.72E-29        | 7.27E-35        | 5.80E-29        | 9.46E-29        | 3.81E-30        | 1.27E-30        | 1.16E-33        | 1.76E-26        | 9.49E-29        | 7.19E-27        | 7.23E-28        | 3.38E-31        | 1.23E-30        | 1.54E-33        |
| 340           | 1.20E-28        | 9.48E-34        | 3.55E-28        | 5.67E-28        | 3.10E-29        | 1.02E-29        | 1.24E-32        | 7.86E-26        | 5.47E-28        | 3.36E-26        | 4.00E-27        | 3.06E-30        | 9.24E-30        | 1.79E-32        |
| 360           | 6.76E-28        | 9.36E-33        | 1.79E-27        | 2.80E-27        | 2.01E-28        | 6.55E-29        | 1.02E-31        | 2.99E-25        | 2.61E-27        | 1.33E-25        | 1.84E-26        | 2.19E-29        | 5.60E-29        | 1.59E-31        |
| 380           | 3.20E-27        | 7.30E-32        | 7.68E-27        | 1.18E-26        | 1.08E-27        | 3.48E-28        | 6.82E-31        | 9.96E-25        | 1.07E-26        | 4.60E-25        | 7.26E-26        | 1.28E-28        | 2.82E-28        | 1.13E-30        |
| 400           | 1.30E-26        | 4.66E-31        | 2.86E-26        | 4.30E-26        | 4.90E-27        | 1.57E-27        | 3.78E-30        | 2.95E-24        | 3.79E-26        | 1.41E-24        | 2.51E-25        | 6.28E-28        | 1.22E-27        | 6.62E-30        |

**Table S4A** The rate constants of addition reactions of AF with NO<sub>3</sub> reactions at 200-400K (unit: cm<sup>3</sup>molecule<sup>-1</sup>s<sup>-1</sup>)

| T(K)          | k <sub>1</sub>  | k <sub>2</sub>  | k <sub>3</sub>  | k <sub>4</sub>  | k <sub>5</sub>  | k <sub>6</sub>  | k <sub>7</sub>  | k <sub>1'</sub> | k <sub>2'</sub> | k <sub>3'</sub> | k <sub>4'</sub> | k <sub>5'</sub> | k <sub>6'</sub> | k <sub>7'</sub> |
|---------------|-----------------|-----------------|-----------------|-----------------|-----------------|-----------------|-----------------|-----------------|-----------------|-----------------|-----------------|-----------------|-----------------|-----------------|
| 200           | 4.19E-28        | 2.84E-37        | 3.96E-26        | 3.85E-25        | 1.27E-28        | 2.34E-27        | 1.66E-37        | 3.45E-21        | 1.23E-34        | 5.69E-22        | 9.86E-23        | 3.80E-27        | 4.62E-25        | 9.35E-36        |
| 220           | 3.09E-27        | 1.77E-35        | 2.13E-25        | 1.53E-24        | 1.43E-27        | 1.49E-26        | 9.21E-36        | 6.09E-21        | 4.19E-33        | 1.16E-21        | 3.14E-22        | 3.03E-26        | 1.98E-24        | 3.85E-34        |
| 240           | 1.66E-26        | 5.65E-34        | 8.77E-25        | 4.87E-24        | 1.10E-26        | 7.11E-26        | 2.66E-34        | 9.93E-21        | 8.08E-32        | 2.12E-21        | 8.35E-22        | 1.74E-25        | 6.77E-24        | 8.66E-33        |
| 260           | 7.00E-26        | 1.07E-32        | 2.95E-24        | 1.32E-23        | 6.22E-26        | 2.70E-25        | 4.62E-33        | 1.52E-20        | 1.00E-30        | 3.59E-21        | 1.94E-21        | 7.71E-25        | 1.94E-23        | 1.22E-31        |
| 280           | 2.42E-25        | 1.35E-31        | 8.41E-24        | 3.13E-23        | 2.79E-25        | 8.55E-25        | 5.41E-32        | 2.22E-20        | 8.74E-30        | 5.69E-21        | 4.02E-21        | 2.80E-24        | 4.84E-23        | 1.19E-30        |
| <b>298.15</b> | <b>6.53E-25</b> | <b>1.01E-30</b> | <b>1.95E-23</b> | <b>6.26E-23</b> | <b>9.20E-25</b> | <b>2.15E-24</b> | <b>3.82E-31</b> | <b>3.01E-20</b> | <b>4.90E-29</b> | <b>8.27E-21</b> | <b>7.24E-21</b> | <b>7.81E-24</b> | <b>1.00E-22</b> | <b>7.31E-30</b> |
| 300           | 7.18E-25        | 1.22E-30        | 2.11E-23        | 6.69E-23        | 1.03E-24        | 2.35E-24        | 4.61E-31        | 3.10E-20        | 5.77E-29        | 8.57E-21        | 7.66E-21        | 8.62E-24        | 1.08E-22        | 8.69E-30        |
| 320           | 1.87E-24        | 8.46E-30        | 4.75E-23        | 1.31E-22        | 3.27E-24        | 5.72E-24        | 3.03E-30        | 4.20E-20        | 3.04E-28        | 1.24E-20        | 1.36E-20        | 2.33E-23        | 2.19E-22        | 4.98E-29        |
| 340           | 4.39E-24        | 4.70E-29        | 9.80E-23        | 2.39E-22        | 9.11E-24        | 1.27E-23        | 1.60E-29        | 5.53E-20        | 1.32E-27        | 1.72E-20        | 2.26E-20        | 5.63E-23        | 4.12E-22        | 2.34E-28        |
| 360           | 9.44E-24        | 2.18E-28        | 1.88E-22        | 4.10E-22        | 2.28E-23        | 2.58E-23        | 7.12E-29        | 7.10E-20        | 4.93E-27        | 2.33E-20        | 3.59E-20        | 1.24E-22        | 7.29E-22        | 9.32E-28        |
| 380           | 1.88E-23        | 8.63E-28        | 3.38E-22        | 6.69E-22        | 5.22E-23        | 4.91E-23        | 2.71E-28        | 8.94E-20        | 1.61E-26        | 3.06E-20        | 5.46E-20        | 2.54E-22        | 1.22E-21        | 3.23E-27        |
| 400           | 3.52E-23        | 2.99E-27        | 5.77E-22        | 1.04E-21        | 1.10E-22        | 8.81E-23        | 9.10E-28        | 1.10E-19        | 4.69E-26        | 3.94E-20        | 8.00E-20        | 4.86E-22        | 1.95E-21        | 9.93E-27        |

**Table S5A** The rate constants of abstraction reactions of AF with NO<sub>3</sub> reactions at 200-400K (unit: cm<sup>3</sup>molecule<sup>-1</sup>s<sup>-1</sup>)

| T(K)          | k <sub>8</sub>  | k <sub>9</sub>  | k <sub>10</sub> | k <sub>11</sub> | k <sub>12</sub> |
|---------------|-----------------|-----------------|-----------------|-----------------|-----------------|
| 200           | 2.69E-31        | 4.04E-31        | 1.46E-30        | 9.53E-23        | 3.72E-28        |
| 220           | 8.51E-30        | 1.53E-29        | 5.16E-29        | 4.23E-22        | 8.20E-27        |
| 240           | 1.54E-28        | 3.20E-28        | 1.02E-27        | 1.49E-21        | 1.10E-25        |
| 260           | 1.81E-27        | 4.26E-27        | 1.30E-26        | 4.36E-21        | 9.96E-25        |
| 280           | 1.51E-26        | 3.95E-26        | 1.16E-25        | 1.11E-20        | 6.68E-24        |
| <b>298.15</b> | <b>8.15E-26</b> | <b>2.33E-25</b> | <b>6.62E-25</b> | <b>2.34E-20</b> | <b>3.04E-23</b> |
| 300           | 9.57E-26        | 2.76E-25        | 7.81E-25        | 2.51E-20        | 3.51E-23        |
| 320           | 4.86E-25        | 1.52E-24        | 4.18E-24        | 5.19E-20        | 1.51E-22        |
| 340           | 2.06E-24        | 6.90E-24        | 1.85E-23        | 9.91E-20        | 5.51E-22        |
| 360           | 7.45E-24        | 2.67E-23        | 6.98E-23        | 1.77E-19        | 1.75E-21        |
| 380           | 2.37E-23        | 8.99E-23        | 2.30E-22        | 3.00E-19        | 4.97E-21        |
| 400           | 6.77E-23        | 2.70E-22        | 6.78E-22        | 4.84E-19        | 1.28E-20        |

**Table S6A** The rate constants of AF with O<sub>3</sub> at 200-400K (unit: cm<sup>3</sup>molecule<sup>-1</sup>s<sup>-1</sup>)

| T(K)          | k <sub>1</sub>  | k <sub>2</sub>  | k <sub>3</sub>  | k <sub>4</sub>  | k <sub>5</sub>  | k <sub>6</sub>  | k <sub>1'</sub> | k <sub>2'</sub> | k <sub>3'</sub> | k <sub>4'</sub> | k <sub>5'</sub> | k <sub>6'</sub> |
|---------------|-----------------|-----------------|-----------------|-----------------|-----------------|-----------------|-----------------|-----------------|-----------------|-----------------|-----------------|-----------------|
| 200           | 1.54E-39        | 1.21E-39        | 3.70E-35        | 9.40E-36        | 2.88E-35        | 3.50E-39        | 4.00E-33        | 3.41E-30        | 2.58E-32        | 3.77E-35        | 2.17E-40        | 6.02E-34        |
| 220           | 1.86E-37        | 1.53E-37        | 2.03E-33        | 5.69E-34        | 1.60E-33        | 4.24E-37        | 1.25E-31        | 6.21E-29        | 6.87E-31        | 2.00E-33        | 3.60E-38        | 2.14E-32        |
| 240           | 1.02E-35        | 8.77E-36        | 5.80E-32        | 1.77E-32        | 4.61E-32        | 2.34E-35        | 2.23E-30        | 7.07E-28        | 1.07E-29        | 5.57E-32        | 2.58E-36        | 4.27E-31        |
| 260           | 3.07E-34        | 2.73E-34        | 1.00E-30        | 3.28E-31        | 8.03E-31        | 7.08E-34        | 2.60E-29        | 5.61E-27        | 1.11E-28        | 9.41E-31        | 9.74E-35        | 5.45E-30        |
| 280           | 5.73E-33        | 5.25E-33        | 1.16E-29        | 4.05E-30        | 9.40E-30        | 1.33E-32        | 2.15E-28        | 3.35E-26        | 8.36E-28        | 1.07E-29        | 2.21E-33        | 4.88E-29        |
| <b>298.15</b> | <b>5.86E-32</b> | <b>5.50E-32</b> | <b>8.18E-29</b> | <b>2.98E-29</b> | <b>6.64E-29</b> | <b>1.36E-31</b> | <b>1.15E-27</b> | <b>1.39E-25</b> | <b>4.15E-27</b> | <b>7.42E-29</b> | <b>2.64E-32</b> | <b>2.79E-28</b> |
| 300           | 7.32E-32        | 6.88E-32        | 9.85E-29        | 3.61E-29        | 8.00E-29        | 1.70E-31        | 1.35E-27        | 1.59E-25        | 4.84E-27        | 8.93E-29        | 3.34E-32        | 3.29E-28        |
| 320           | 6.85E-31        | 6.59E-31        | 6.44E-28        | 2.47E-28        | 5.26E-28        | 1.60E-30        | 6.84E-27        | 6.28E-25        | 2.27E-26        | 5.75E-28        | 3.62E-31        | 1.76E-27        |
| 340           | 4.97E-30        | 4.87E-30        | 3.40E-27        | 1.36E-27        | 2.79E-27        | 1.16E-29        | 2.88E-26        | 2.12E-24        | 8.94E-26        | 3.00E-27        | 2.99E-30        | 7.82E-27        |
| 360           | 2.91E-29        | 2.90E-29        | 1.50E-26        | 6.21E-27        | 1.24E-26        | 6.83E-29        | 1.04E-25        | 6.30E-24        | 3.04E-25        | 1.31E-26        | 1.97E-29        | 2.96E-26        |
| 380           | 1.42E-28        | 1.44E-28        | 5.70E-26        | 2.44E-26        | 4.71E-26        | 3.35E-28        | 3.29E-25        | 1.68E-23        | 9.16E-25        | 4.92E-26        | 1.07E-28        | 9.78E-26        |
| 400           | 5.97E-28        | 6.14E-28        | 1.91E-25        | 8.38E-26        | 1.58E-25        | 1.41E-27        | 9.34E-25        | 4.08E-23        | 2.48E-24        | 1.63E-25        | 4.91E-28        | 2.88E-25        |

**Table S7A** The rate constants of addition reactions of AF with Cl at 200-400K (unit: cm<sup>3</sup>molecule<sup>-1</sup>s<sup>-1</sup>)

| T(K)          | k <sub>1</sub>  | k <sub>2</sub>  | k <sub>3</sub>  | k <sub>4</sub>  | k <sub>5</sub>  | k <sub>6</sub>  | k <sub>7</sub>  | k <sub>1'</sub> | k <sub>2'</sub> | k <sub>3'</sub> | k <sub>4'</sub> | k <sub>5'</sub> | k <sub>6'</sub> | k <sub>7'</sub> |
|---------------|-----------------|-----------------|-----------------|-----------------|-----------------|-----------------|-----------------|-----------------|-----------------|-----------------|-----------------|-----------------|-----------------|-----------------|
| 200           | 1.07E-13        | 1.74E-25        | 2.32E-16        | 1.23E-12        | 8.31E-18        | 1.06E-17        | 3.17E-22        | 3.05E-13        | 1.14E-27        | 6.88E-14        | 2.84E-14        | 9.27E-20        | 5.06E-19        | 6.11E-23        |
| 220           | 1.33E-13        | 2.77E-24        | 5.46E-16        | 1.49E-12        | 2.92E-17        | 3.41E-17        | 2.44E-21        | 3.82E-13        | 2.86E-26        | 9.44E-14        | 4.50E-14        | 4.50E-19        | 2.03E-18        | 5.50E-22        |
| 240           | 1.62E-13        | 2.83E-23        | 1.13E-15        | 1.78E-12        | 8.45E-17        | 9.20E-17        | 1.35E-20        | 4.69E-13        | 4.28E-25        | 1.25E-13        | 6.71E-14        | 1.71E-18        | 6.55E-18        | 3.48E-21        |
| 260           | 1.94E-13        | 2.05E-22        | 2.11E-15        | 2.09E-12        | 2.10E-16        | 2.16E-16        | 5.86E-20        | 5.64E-13        | 4.27E-24        | 1.60E-13        | 9.52E-14        | 5.33E-18        | 1.79E-17        | 1.68E-20        |
| 280           | 2.30E-13        | 1.13E-21        | 3.66E-15        | 2.43E-12        | 4.65E-16        | 4.52E-16        | 2.08E-19        | 6.69E-13        | 3.10E-23        | 2.00E-13        | 1.30E-13        | 1.43E-17        | 4.28E-17        | 6.55E-20        |
| <b>298.15</b> | <b>2.64E-13</b> | <b>4.39E-21</b> | <b>5.70E-15</b> | <b>2.76E-12</b> | <b>8.78E-16</b> | <b>8.19E-16</b> | <b>5.71E-19</b> | <b>7.72E-13</b> | <b>1.50E-22</b> | <b>2.41E-13</b> | <b>1.68E-13</b> | <b>3.16E-17</b> | <b>8.60E-17</b> | <b>1.94E-19</b> |
| 300           | 2.68E-13        | 5.00E-21        | 5.94E-15        | 2.79E-12        | 9.33E-16        | 8.67E-16        | 6.29E-19        | 7.83E-13        | 1.74E-22        | 2.45E-13        | 1.72E-13        | 3.41E-17        | 9.19E-17        | 2.15E-19        |
| 320           | 3.09E-13        | 1.85E-20        | 9.17E-15        | 3.18E-12        | 1.73E-15        | 1.55E-15        | 1.67E-18        | 9.06E-13        | 7.97E-22        | 2.96E-13        | 2.22E-13        | 7.33E-17        | 1.81E-16        | 6.14E-19        |
| 340           | 3.53E-13        | 5.94E-20        | 1.35E-14        | 3.60E-12        | 3.01E-15        | 2.60E-15        | 3.99E-18        | 1.04E-12        | 3.07E-21        | 3.51E-13        | 2.79E-13        | 1.45E-16        | 3.32E-16        | 1.56E-18        |
| 360           | 4.00E-13        | 1.68E-19        | 1.92E-14        | 4.04E-12        | 4.95E-15        | 4.14E-15        | 8.69E-18        | 1.18E-12        | 1.02E-20        | 4.12E-13        | 3.45E-13        | 2.68E-16        | 5.72E-16        | 3.59E-18        |
| 380           | 4.50E-13        | 4.30E-19        | 2.65E-14        | 4.51E-12        | 7.77E-15        | 6.32E-15        | 1.76E-17        | 1.33E-12        | 3.03E-20        | 4.78E-13        | 4.19E-13        | 4.67E-16        | 9.37E-16        | 7.64E-18        |
| 400           | 5.03E-13        | 1.00E-18        | 3.56E-14        | 5.00E-12        | 1.17E-14        | 9.31E-15        | 3.32E-17        | 1.49E-12        | 8.08E-20        | 5.49E-13        | 5.02E-13        | 7.74E-16        | 1.47E-15        | 1.51E-17        |

**Table S8A** The rate constants of abstraction reactions of AF with Cl at 200-400K (unit: cm<sup>3</sup>molecule<sup>-1</sup>s<sup>-1</sup>)

| T(K)          | k <sub>8</sub>  | k <sub>9</sub>  | k <sub>10</sub> | k <sub>11</sub> | k <sub>12</sub> |
|---------------|-----------------|-----------------|-----------------|-----------------|-----------------|
| 200           | 1.05E-23        | 2.47E-25        | 1.14E-24        | 4.59E-16        | 7.25E-15        |
| 220           | 2.14E-22        | 8.31E-24        | 3.29E-23        | 1.63E-15        | 2.58E-14        |
| 240           | 2.67E-21        | 1.58E-22        | 5.51E-22        | 4.75E-15        | 7.56E-14        |
| 260           | 2.29E-20        | 1.94E-21        | 6.07E-21        | 1.19E-14        | 1.90E-13        |
| 280           | 1.46E-19        | 1.68E-20        | 4.79E-20        | 2.65E-14        | 4.23E-13        |
| <b>298.15</b> | <b>6.37E-19</b> | <b>9.32E-20</b> | <b>2.48E-19</b> | <b>5.02E-14</b> | <b>8.04E-13</b> |
| 300           | 7.33E-19        | 1.10E-19        | 2.90E-19        | 5.34E-14        | 8.55E-13        |
| 320           | 3.04E-18        | 5.74E-19        | 1.41E-18        | 9.95E-14        | 1.59E-12        |
| 340           | 1.07E-17        | 2.49E-18        | 5.76E-18        | 1.73E-13        | 2.79E-12        |
| 360           | 3.32E-17        | 9.21E-18        | 2.02E-17        | 2.86E-13        | 4.60E-12        |
| 380           | 9.15E-17        | 2.99E-17        | 6.25E-17        | 4.51E-13        | 7.26E-12        |
| 400           | 2.29E-16        | 8.68E-17        | 1.73E-16        | 6.82E-13        | 1.10E-11        |

**Table S1B** Arrhenius formulas for elementary reactions of AF with OH over the temperature range of 200-400 K (unit: cm<sup>3</sup>molecule<sup>-1</sup>s<sup>-1</sup>)

|       | Reactions                          | k <sub>298.15K</sub> | Arrhenius formulas       | R <sup>2</sup> |
|-------|------------------------------------|----------------------|--------------------------|----------------|
| (A1)  | AF+OH→TS1A→IM1A                    | 2.03E-18             | k=1,32E-14exp(-2606.8/T) | 0.9995         |
| (A2)  | AF+OH→TS2A→IM2A                    | 4.79E-22             | k=6.26E-14exp(-5559.7/T) | 0.9999         |
| (A3)  | AF+OH→TS3A→IM3A                    | 2.62E-17             | k=9.09E-14exp(-2418.2/T) | 0.9995         |
| (A4)  | AF+OH→TS4A→IM4A                    | 1.88E-20             | k=1.75E-13exp(-4771.5/T) | 0.9999         |
| (A5)  | AF+OH→TS5A→IM5A                    | 4.21E-17             | k=5.19E-13exp(-2796.2/T) | 0.9996         |
| (A6)  | AF+OH→TS6A→IM6A                    | 3.53E-17             | k=2.52E-13exp(-2632.7/T) | 0.9995         |
| (A7)  | AF+OH→TS7A→IM7A                    | 9.43E-21             | k=1.32E-14exp(-4207.9/T) | 0.9998         |
| (A1') | AF+OH→TS1'A→IM1'A                  | 3.35E-17             | k=1.51E-14exp(-1810.8/T) | 0.9999         |
| (A2') | AF+OH→TS2'A→IM2'A                  | 5.37E-18             | k=1.60E-14exp(-2373.4/T) | 0.9994         |
| (A3') | AF+OH→TS3'A→IM3'A                  | 3.27E-18             | k=5.78E-14exp(-2904.1/T) | 0.9996         |
| (A4') | AF+OH→TS4'A→IM4'A                  | 4.52E-19             | k=1.95E-13exp(-3856.9/T) | 0.9998         |
| (A5') | AF+OH→TS5'A→IM5'A                  | 4.74E-21             | k=3.11E-13exp(-5354.4/T) | 0.9999         |
| (A6') | AF+OH→TS6'A→IM6'A                  | 3.70E-21             | k=8.78E-14exp(-5051.6/T) | 0.9999         |
| (A7') | AF+OH→TS7'A→IM7'A                  | 9.46E-21             | k=1.33E-14exp(-4208.2/T) | 0.9999         |
|       | k <sub>add</sub>                   | 1.48E-16             | k=2.13E-11exp(-4403.8/T) | 0.9998         |
| (A8)  | AF+OH→TS8A→IM8A+H <sub>2</sub> O   | 7.88E-18             | k=3.07E-11exp(-4282.5/T) | 0.9998         |
| (A9)  | AF+OH→TS9A→IM9A+H <sub>2</sub> O   | 1.70E-17             | k=2.84E-10exp(-5139.7/T) | 0.9999         |
| (A10) | AF+OH→TS10A→IM10A+H <sub>2</sub> O | 8.90E-18             | k=7.24E-12exp(-850.68/T) | 0.9997         |
| (A11) | AF+OH→TS11A→IM11A+H <sub>2</sub> O | 4.01E-13             | k=8.38E-11exp(-3119.5/T) | 0.9997         |
| (A12) | AF+OH→TS12A→IM12A+H <sub>2</sub> O | 2.30E-15             | k=4.99E-13exp(-2398.0/T) | 0.9978         |
|       | k <sub>abs</sub>                   | 4.03E-13             | k=7.69E-12exp(-864.51/T) | 0.9942         |
|       | k <sub>total</sub>                 | 4.04E-13             | k=7.71E-12exp(-865.03/T) | 0.9941         |

**Table S2B** Arrhenius formulas for elementary reactions of AF with HO<sub>2</sub> over the temperature range of 200-400 K (unit: cm<sup>3</sup>molecule<sup>-1</sup>s<sup>-1</sup>)

|       | Reactions                        | k <sub>298.15K</sub> | Arrhenius formulas       | R <sup>2</sup> |
|-------|----------------------------------|----------------------|--------------------------|----------------|
| (B1)  | AF+ HO <sub>2</sub> →TS1B→IM1B   | 1.55E-30             | k=2.70E-15exp(-10451/T)  | 1.0000         |
| (B2)  | AF+ HO <sub>2</sub> →TS2B→IM2B   | 3.00E-36             | k=4.92E-16exp(-13866/T)  | 1.0000         |
| (B3)  | AF+ HO <sub>2</sub> →TS3B→IM3B   | 6.11E-30             | k=1.06E-15exp(-9762.7/T) | 1.0000         |
| (B4)  | AF+ HO <sub>2</sub> →TS4B→IM4B   | 1.03E-29             | k=1.51E-15exp(-9633.3/T) | 1.0000         |
| (B5)  | AF+ HO <sub>2</sub> →TS5B→IM5B   | 2.83E-31             | k=8.36E-15exp(-11296/T)  | 1.0000         |
| (B6)  | AF+ HO <sub>2</sub> →TS6B→IM6B   | 9.52E-32             | k=2.35E-15exp(-11241/T)  | 1.0000         |
| (B7)  | AF+ HO <sub>2</sub> →TS7B→IM7B   | 6.10E-35             | k=2.68E-16exp(-12787/T)  | 1.0000         |
| (B1') | AF+ HO <sub>2</sub> →TS1'B→IM1'B | 2.75E-27             | k=1.46E-15exp(-8037.9/T) | 0.9999         |
| (B2') | AF+ HO <sub>2</sub> →TS2'B→IM2'B | 1.08E-29             | k=6.04E-16exp(-9425.7/T) | 1.0000         |
| (B3') | AF+ HO <sub>2</sub> →TS3'B→IM3'B | 1.06E-27             | k=1.29E-15exp(-8284.0/T) | 0.9999         |
| (B4') | AF+ HO <sub>2</sub> →TS4'B→IM4'B | 8.66E-29             | k=2.28E-15exp(-9201.1/T) | 1.0000         |
| (B5') | AF+ HO <sub>2</sub> →TS5'B→IM5'B | 2.19E-32             | k=4.69E-15exp(-11886/T)  | 1.0000         |
| (B6') | AF+ HO <sub>2</sub> →TS6'B→IM6'B | 9.99E-32             | k=7.43E-16exp(-10884/T)  | 1.0000         |
| (B7') | AF+ HO <sub>2</sub> →TS7'B→IM7'B | 7.36E-35             | k=1.41E-15exp(-13225/T)  | 1.0000         |
|       | k <sub>total</sub>               | 7.02E-33             | k=2.91E-15exp(-8133.1/T) | 0.9999         |



**Table S3B** Arrhenius formulas for elementary reactions of AF with NO<sub>3</sub> over the temperature range of 200-400 K (unit: cm<sup>3</sup>molecule<sup>-1</sup>s<sup>-1</sup>)

|       | Reactions                                         | k <sub>298.15K</sub> | Arrhenius formulas       | R <sup>2</sup> |
|-------|---------------------------------------------------|----------------------|--------------------------|----------------|
| (C1)  | AF+NO <sub>3</sub> →AF-NO3-1→TS1C→IM1C            | 6.53E-25             | k=2.76E-18exp(-4537.1/T) | 0.9998         |
| (C2)  | AF+ NO <sub>3</sub> →AF-NO3-1→TS2C→IM2C           | 1.01E-30             | k=2.95E-17exp(-9233.1/T) | 1.0000         |
| (C3)  | AF+ NO <sub>3</sub> →AF-NO3-1→TS3C→IM3C           | 1.95E-23             | k=7.83E-18exp(-3835.6/T) | 0.9998         |
| (C4)  | AF+ NO <sub>3</sub> →AF-NO3-1→TS4C→IM4C           | 6.26E-23             | k=2.64E-18exp(-3163.0/T) | 0.9997         |
| (C5)  | AF+ NO <sub>3</sub> →AF-NO3-1→TS5C→IM5C           | 9.20E-25             | k=8.98E-17exp(-5472.7/T) | 0.9999         |
| (C6)  | AF+ NO <sub>3</sub> →AF-NO3-1→TS6C→IM6C           | 2.15E-24             | k=3.09E-18exp(-4215.6/T) | 0.9998         |
| (C7)  | AF+ NO <sub>3</sub> →TS7C→IM7C                    | 3.82E-31             | k=4.65E-18exp(-8970.9/T) | 1.0000         |
| (C1') | AF+NO <sub>3</sub> →AF-NO3-1'→TS1'C→IM1'C         | 3.01E-20             | k=3.31E-18exp(-1388.4/T) | 0.9983         |
| (C2') | AF+NO <sub>3</sub> →AF-NO3-1'→TS2'C→IM2'C         | 4.90E-29             | k=1.68E-17exp(-7906.5/T) | 0.9999         |
| (C3') | AF+NO <sub>3</sub> →AF-NO3-1'→TS3'C→IM3'C         | 8.27E-21             | k=2.55E-18exp(-1696.3/T) | 0.9989         |
| (C4') | AF+NO <sub>3</sub> →AF-NO3-1'→TS4'C→IM4'C         | 7.24E-21             | k=6.06E-17exp(-2680.8/T) | 0.9996         |
| (C5') | AF+NO <sub>3</sub> →AF-NO3-1'→TS5'C→IM5'C         | 7.81E-24             | k=5.81E-17exp(-4705.0/T) | 0.9999         |
| (C6') | AF+NO <sub>3</sub> →AF-NO3-1'→TS6'C→IM6'C         | 1.00E-22             | k=7.67E-18exp(-3340.2/T) | 0.9997         |
| (C7') | AF+ NO <sub>3</sub> →TS7'C→IM7'C                  | 7.31E-30             | k=9.84E-18exp(-8314.6/T) | 1.0000         |
|       | k <sub>add</sub>                                  | 4.59E-20             | k=1.59E-14exp(-7739.4/T) | 0.9999         |
| (C8)  | AF+ NO <sub>3</sub> →TS8C→IM8C+HNO <sub>3</sub>   | 8.15E-26             | k=1.68E-13exp(-8128.9/T) | 1.0000         |
| (C9)  | AF+ NO <sub>3</sub> →TS9C→IM9C+HNO <sub>3</sub>   | 2.33E-25             | k=2.95E-13exp(-7984.9/T) | 0.9999         |
| (C10) | AF+ NO <sub>3</sub> →TS10C→IM10C+HNO <sub>3</sub> | 6.62E-25             | k=2.29E-15exp(-3414.1/T) | 0.9997         |
| (C11) | AF+ NO <sub>3</sub> →TS11C→IM11C+HNO <sub>3</sub> | 2.34E-20             | k=4.09E-13exp(-6941.9/T) | 0.9999         |
| (C12) | AF+ NO <sub>3</sub> →TS12C→IM12C+HNO <sub>3</sub> | 3.04E-23             | k=1.13E-17exp(-1616.2/T) | 0.9942         |
|       | k <sub>abs</sub>                                  | 2.34E-20             | k=2.37E-15exp(-3422.2/T) | 0.9997         |
|       | k <sub>total</sub>                                | 6.93E-20             | k=8.85E-17exp(-2067.6/T) | 0.9799         |

**Table S4B** Arrhenius formulas for elementary reactions of AF with O<sub>3</sub> over the temperature range of 200-400 K (unit: cm<sup>3</sup>molecule<sup>-1</sup>s<sup>-1</sup>)

|       | Reactions                       | k <sub>298.15K</sub> | Arrhenius formulas       | R <sup>2</sup> |
|-------|---------------------------------|----------------------|--------------------------|----------------|
| (D1)  | AF+O <sub>3</sub> →TS1D→IM1D    | 5.86E-32             | k=2.15E-16exp(-10673/T)  | 1.0000         |
| (D2)  | AF+ O <sub>3</sub> →TS2D→IM2D   | 5.50E-32             | k=2.90E-16exp(-10781/T)  | 1.0000         |
| (D3)  | AF+ O <sub>3</sub> →TS3D→IM3D   | 8.18E-29             | k=9.16E-16exp(-8946.6/T) | 1.0000         |
| (D4)  | AF+ O <sub>3</sub> →TS4D→IM4D   | 2.98E-29             | k=6.98E-16exp(-9165.8/T) | 1.0000         |
| (D5)  | AF+ O <sub>3</sub> →TS5D→IM5D   | 6.64E-29             | k=8.07E-16exp(-8970.8/T) | 1.0000         |
| (D6)  | AF+ O <sub>3</sub> →TS6D→IM6D   | 1.36E-31             | k=5.27E-16exp(-10689/T)  | 1.0000         |
| (D1') | AF+ O <sub>3</sub> →TS1'D→IM1'D | 1.15E-27             | k=2.04E-16exp(-7709.1/T) | 0.9999         |
| (D2') | AF+ O <sub>3</sub> →TS2'D→IM2'D | 1.39E-25             | k=4.55E-16exp(-6520.0/T) | 0.9999         |
| (D3') | AF+ O <sub>3</sub> →TS3'D→IM3'D | 4.15E-27             | k=2.23E-16exp(-7353.6/T) | 0.9999         |
| (D4') | AF+ O <sub>3</sub> →TS4'D→IM4'D | 7.42E-29             | k=6.56E-16exp(-8875.8/T) | 1.0000         |
| (D5') | AF+ O <sub>3</sub> →TS5'D→IM5'D | 2.64E-32             | k=1.03E-15exp(-11380/T)  | 1.0000         |
| (D6') | AF+ O <sub>3</sub> →TS6'D→IM6'D | 2.79E-28             | k=1.29E-16exp(-7996.2/T) | 0.9999         |
|       | k <sub>total</sub>              | 1.45E-25             | k=5.38E-16exp(-6555.2/T) | 0.9999         |

**Table S5B** Arrhenius formulas for elementary reactions of AF with Cl over the temperature range of 200-400 K (unit: cm<sup>3</sup>molecule<sup>-1</sup>s<sup>-1</sup>)

|       | Reactions                     | k <sub>298.15K</sub> | Arrhenius formulas       | R <sup>2</sup> |
|-------|-------------------------------|----------------------|--------------------------|----------------|
| (E1)  | AF+Cl→AF-Cl-1→TS1E→IM1E       | 2.64E-13             | k=2.22E-12exp(-622.06/T) | 0.9918         |
| (E2)  | AF+Cl→AF-Cl-1→TS2E→IM2E       | 4.39E-21             | k=5.43E-12exp(-6229.8/T) | 0.9999         |
| (E3)  | AF+Cl→AF-Cl-1→TS3E→IM3E       | 5.70E-15             | k=5.10E-12exp(-2014.4/T) | 0.9992         |
| (E4)  | AF+Cl→AF-Cl-1→TS4E→IM4E       | 2.76E-12             | k=1.90E-11exp(-563.22/T) | 0.9900         |
| (E5)  | AF+Cl→AF-Cl-1→TS5E→IM5E       | 8.78E-16             | k=1.54E-11exp(-2901.8/T) | 0.9996         |
| (E6)  | AF+Cl→AF-Cl-1→TS6E→IM6E       | 8.19E-16             | k=7.63E-12exp(-2712.8/T) | 0.9996         |
| (E7)  | AF+Cl→TS7E→IM7E               | 5.71E-19             | k=3.25E-12exp(-4625.9/T) | 0.9998         |
| (E1') | AF+Cl→AF-Cl-1'→TS1'E→IM1'E    | 7.72E-13             | k=6.77E-12exp(-635.43/T) | 0.9921         |
| (E2') | AF+Cl→AF-Cl-1'→TS2'E→IM2'E    | 1.50E-22             | k=5.35E-12exp(-7232.5/T) | 0.9999         |
| (E3') | AF+Cl→AF-Cl-1'→TS3'E→IM3'E    | 2.41E-13             | k=4.08E-12exp(-831.94/T) | 0.9954         |
| (E4') | AF+Cl→AF-Cl-1'→TS4'E→IM4'E    | 1.68E-13             | k=8.29E-12exp(-1150.8/T) | 0.9976         |
| (E5') | AF+Cl→AF-Cl-1'→TS5'E→IM5'E    | 3.16E-17             | k=6.03E-12exp(-3613.5/T) | 0.9998         |
| (E6') | AF+Cl→AF-Cl-1'→TS6'E→IM6'E    | 8.60E-17             | k=3.97E-12exp(-3190.5/T) | 0.9997         |
| (E7') | AF+Cl→TS7'E→IM7'E             | 1.94E-19             | k=3.49E-12exp(-4968.7/T) | 0.9999         |
|       | k <sub>add</sub>              | 4.21E-12             | k=4.66E-09exp(-6759.9/T) | 0.9999         |
| (E8)  | AF+Cl→AF-Cl-2→TS8E→IM8E+HCl   | 6.37E-19             | k=2.84E-08exp(-7872.0/T) | 0.9999         |
| (E9)  | AF+Cl→TS9E→IM9E+HCl           | 9.32E-20             | k=2.47E-08exp(-7538.3/T) | 0.9999         |
| (E10) | AF+Cl→TS10E→IM10E+HCl         | 2.48E-19             | k=9.45E-10exp(-2922.6/T) | 0.9996         |
| (E11) | AF+Cl→AF-Cl-3→TS11E→IM11E+HCl | 5.02E-14             | k=1.56E-08exp(-2931.0/T) | 0.9996         |
| (E12) | AF+Cl→TS11E→IM12E+HCl         | 8.04E-13             | k=3.50E-11exp(-617.51/T) | 0.9896         |
|       | k <sub>abs</sub>              | 8.54E-13             | k=9.67E-10exp(-2930.5/T) | 0.9896         |
|       | k <sub>total</sub>            | 5.07E-12             | k=7.84E-10exp(-947.77/T) | 0.9326         |

**Table S1C** The lifetimes of AF+OH addition reactions according to the rate constants at 200-400K

| T(K)          | $\tau_1$ (s)    | $\tau_2$ (s)    | $\tau_3$ (s)    | $\tau_4$ (s)    | $\tau_5$ (s)    | $\tau_6$ (s)    | $\tau_7$ (s)    | $\tau_1$ (s)    | $\tau_2$ (s)    | $\tau_3$ (s)    | $\tau_4$ (s)    | $\tau_5$ (s)    | $\tau_6$ (s)    | $\tau_7$ (s)    |
|---------------|-----------------|-----------------|-----------------|-----------------|-----------------|-----------------|-----------------|-----------------|-----------------|-----------------|-----------------|-----------------|-----------------|-----------------|
| 200           | 9.38E+09        | 5.76E+21        | 4.30E+12        | 8.15E+08        | 1.20E+14        | 9.45E+13        | 3.16E+18        | 3.28E+09        | 8.78E+23        | 1.45E+10        | 3.53E+10        | 1.08E+16        | 1.98E+15        | 1.64E+19        |
| 220           | 7.52E+09        | 3.61E+20        | 1.83E+12        | 6.72E+08        | 3.42E+13        | 2.93E+13        | 4.10E+17        | 2.62E+09        | 3.49E+22        | 1.06E+10        | 2.22E+10        | 2.22E+15        | 4.93E+14        | 1.82E+18        |
| 240           | 6.17E+09        | 3.54E+19        | 8.86E+11        | 5.63E+08        | 1.18E+13        | 1.09E+13        | 7.38E+16        | 2.13E+09        | 2.34E+21        | 8.02E+09        | 1.49E+10        | 5.86E+14        | 1.53E+14        | 2.87E+17        |
| 260           | 5.14E+09        | 4.89E+18        | 4.73E+11        | 4.78E+08        | 4.75E+12        | 4.64E+12        | 1.71E+16        | 1.77E+09        | 2.34E+20        | 6.25E+09        | 1.05E+10        | 1.88E+14        | 5.59E+13        | 5.95E+16        |
| 280           | 4.35E+09        | 8.87E+17        | 2.73E+11        | 4.12E+08        | 2.15E+12        | 2.21E+12        | 4.81E+15        | 1.49E+09        | 3.23E+19        | 5.00E+09        | 7.69E+09        | 6.98E+13        | 2.34E+13        | 1.53E+16        |
| <b>298.15</b> | <b>3.79E+09</b> | <b>2.28E+17</b> | <b>1.76E+11</b> | <b>3.62E+08</b> | <b>1.14E+12</b> | <b>1.22E+12</b> | <b>1.75E+15</b> | <b>1.30E+09</b> | <b>6.67E+18</b> | <b>4.15E+09</b> | <b>5.96E+09</b> | <b>3.17E+13</b> | <b>1.16E+13</b> | <b>5.16E+15</b> |
| 300           | 3.73E+09        | 2.00E+17        | 1.68E+11        | 3.58E+08        | 1.07E+12        | 1.15E+12        | 1.59E+15        | 1.28E+09        | 5.74E+18        | 4.08E+09        | 5.81E+09        | 2.94E+13        | 1.09E+13        | 4.65E+15        |
| 320           | 3.24E+09        | 5.39E+16        | 1.09E+11        | 3.14E+08        | 5.78E+11        | 6.46E+11        | 5.98E+14        | 1.10E+09        | 1.25E+18        | 3.38E+09        | 4.51E+09        | 1.36E+13        | 5.52E+12        | 1.63E+15        |
| 340           | 2.83E+09        | 1.68E+16        | 7.39E+10        | 2.78E+08        | 3.33E+11        | 3.85E+11        | 2.51E+14        | 9.64E+08        | 3.26E+17        | 2.85E+09        | 3.58E+09        | 6.89E+12        | 3.01E+12        | 6.41E+14        |
| 360           | 2.50E+09        | 5.94E+15        | 5.20E+10        | 2.48E+08        | 2.02E+11        | 2.42E+11        | 1.15E+14        | 8.49E+08        | 9.76E+16        | 2.43E+09        | 2.90E+09        | 3.73E+12        | 1.75E+12        | 2.78E+14        |
| 380           | 2.22E+09        | 2.33E+15        | 3.77E+10        | 2.22E+08        | 1.29E+11        | 1.58E+11        | 5.69E+13        | 7.53E+08        | 3.30E+16        | 2.09E+09        | 2.39E+09        | 2.14E+12        | 1.07E+12        | 1.31E+14        |
| 400           | 1.99E+09        | 9.95E+14        | 2.81E+10        | 2.00E+08        | 8.53E+10        | 1.07E+11        | 3.01E+13        | 6.72E+08        | 1.24E+16        | 1.82E+09        | 1.99E+09        | 1.29E+12        | 6.81E+11        | 6.61E+13        |

**Table S2C** The lifetimes of AF+OH abstraction reactions according to the rate constants at 200-400K

| T(K)          | $\tau_8$ (s)    | $\tau_9$ (s)    | $\tau_{10}$ (s) | $\tau_{11}$ (s) | $\tau_{12}$ (s) |
|---------------|-----------------|-----------------|-----------------|-----------------|-----------------|
| 200           | 1.64E+14        | 6.20E+13        | 4.87E+14        | 9.28E+06        | 6.77E+10        |
| 220           | 2.35E+13        | 9.42E+12        | 5.01E+13        | 6.71E+06        | 1.74E+10        |
| 240           | 4.61E+12        | 1.93E+12        | 7.41E+12        | 5.04E+06        | 5.55E+09        |
| 260           | 1.14E+12        | 4.98E+11        | 1.45E+12        | 3.91E+06        | 2.08E+09        |
| 280           | 3.42E+11        | 1.54E+11        | 3.56E+11        | 3.11E+06        | 8.87E+08        |
| <b>298.15</b> | <b>1.31E+11</b> | <b>6.05E+10</b> | <b>1.16E+11</b> | <b>2.57E+06</b> | <b>4.48E+08</b> |
| 300           | 1.19E+11        | 5.53E+10        | 1.04E+11        | 2.52E+06        | 4.19E+08        |
| 320           | 4.71E+10        | 2.24E+10        | 3.52E+10        | 2.09E+06        | 2.16E+08        |
| 340           | 2.05E+10        | 9.99E+09        | 1.34E+10        | 1.75E+06        | 1.20E+08        |
| 360           | 9.77E+09        | 4.85E+09        | 5.66E+09        | 1.49E+06        | 7.01E+07        |
| 380           | 5.00E+09        | 2.52E+09        | 2.60E+09        | 1.28E+06        | 4.33E+07        |
| 400           | 2.72E+09        | 1.39E+09        | 1.28E+09        | 1.11E+06        | 2.79E+07        |

**Table S3C** The lifetimes of AF+ HO<sub>2</sub> according to the rate constants at 200-400K

| T(K)          | $\tau_1$ (s)    | $\tau_2$ (s)    | $\tau_3$ (s)    | $\tau_4$ (s)    | $\tau_5$ (s)    | $\tau_6$ (s)    | $\tau_7$ (s)    | $\tau_1$ (s)    | $\tau_2$ (s)    | $\tau_3$ (s)    | $\tau_4$ (s)    | $\tau_5$ (s)    | $\tau_6$ (s)    | $\tau_7$ (s)    |
|---------------|-----------------|-----------------|-----------------|-----------------|-----------------|-----------------|-----------------|-----------------|-----------------|-----------------|-----------------|-----------------|-----------------|-----------------|
| 200           | 1.70E+29        | 2.43E+37        | 1.39E+28        | 6.67E+27        | 3.74E+30        | 1.02E+31        | 2.02E+35        | 1.80E+24        | 4.50E+27        | 6.99E+24        | 3.88E+26        | 1.28E+32        | 5.37E+30        | 3.44E+35        |
| 220           | 1.56E+27        | 4.73E+34        | 1.75E+26        | 8.90E+25        | 2.34E+28        | 6.52E+28        | 6.43E+32        | 4.96E+22        | 6.60E+25        | 1.72E+23        | 6.31E+24        | 6.11E+29        | 4.06E+28        | 8.97E+32        |
| 240           | 3.09E+25        | 2.57E+32        | 4.49E+24        | 2.40E+24        | 3.37E+26        | 9.58E+26        | 5.25E+30        | 2.45E+21        | 1.93E+24        | 7.75E+21        | 2.00E+23        | 7.03E+27        | 6.82E+26        | 6.21E+30        |
| 260           | 1.11E+24        | 3.07E+30        | 2.00E+23        | 1.12E+23        | 9.19E+24        | 2.66E+25        | 8.87E+28        | 1.90E+20        | 9.57E+22        | 5.54E+20        | 1.07E+22        | 1.59E+26        | 2.12E+25        | 9.12E+28        |
| 280           | 6.29E+22        | 6.84E+28        | 1.37E+22        | 7.94E+21        | 4.14E+23        | 1.22E+24        | 2.66E+27        | 2.09E+19        | 7.22E+21        | 5.72E+19        | 8.57E+20        | 6.08E+24        | 1.07E+24        | 2.42E+27        |
| <b>298.15</b> | <b>6.45E+21</b> | <b>3.34E+27</b> | <b>1.64E+21</b> | <b>9.74E+20</b> | <b>3.54E+22</b> | <b>1.05E+23</b> | <b>1.64E+26</b> | <b>3.63E+18</b> | <b>9.25E+20</b> | <b>9.40E+18</b> | <b>1.15E+20</b> | <b>4.57E+23</b> | <b>1.00E+23</b> | <b>1.36E+26</b> |
| 300           | 5.19E+21        | 2.50E+27        | 1.34E+21        | 7.97E+20        | 2.80E+22        | 8.32E+22        | 1.26E+26        | 3.07E+18        | 7.61E+20        | 7.91E+18        | 9.53E+19        | 3.57E+23        | 7.98E+22        | 1.03E+26        |
| 320           | 5.81E+20        | 1.37E+26        | 1.73E+20        | 1.06E+20        | 2.63E+21        | 7.89E+21        | 8.65E+24        | 5.68E+17        | 1.05E+20        | 1.39E+18        | 1.38E+19        | 2.96E+22        | 8.16E+21        | 6.48E+24        |
| 340           | 8.35E+19        | 1.05E+25        | 2.81E+19        | 1.77E+19        | 3.23E+20        | 9.81E+20        | 8.09E+23        | 1.27E+17        | 1.83E+19        | 2.97E+17        | 2.50E+18        | 3.27E+21        | 1.08E+21        | 5.59E+23        |
| 360           | 1.48E+19        | 1.07E+24        | 5.57E+18        | 3.57E+18        | 4.98E+19        | 1.53E+20        | 9.77E+22        | 3.34E+16        | 3.83E+18        | 7.50E+16        | 5.43E+17        | 4.58E+20        | 1.79E+20        | 6.29E+22        |
| 380           | 3.12E+18        | 1.37E+23        | 1.30E+18        | 8.50E+17        | 9.30E+18        | 2.87E+19        | 1.47E+22        | 1.00E+16        | 9.39E+17        | 2.18E+16        | 1.38E+17        | 7.83E+19        | 3.54E+19        | 8.86E+21        |
| 400           | 7.67E+17        | 2.15E+22        | 3.50E+17        | 2.32E+17        | 2.04E+18        | 6.35E+18        | 2.65E+21        | 3.39E+15        | 2.64E+17        | 7.10E+15        | 3.99E+16        | 1.59E+19        | 8.21E+18        | 1.51E+21        |

**Table S4C** The lifetimes of AF+NO<sub>3</sub> addition reactions according to the rate constants at 200-400K

| T(K)          | $\tau_1$ (s)    | $\tau_2$ (s)    | $\tau_3$ (s)    | $\tau_4$ (s)    | $\tau_5$ (s)    | $\tau_6$ (s)    | $\tau_7$ (s)    | $\tau_{1'}$ (s) | $\tau_{2'}$ (s) | $\tau_{3'}$ (s) | $\tau_{4'}$ (s) | $\tau_{5'}$ (s) | $\tau_{6'}$ (s) | $\tau_{7'}$ (s) |
|---------------|-----------------|-----------------|-----------------|-----------------|-----------------|-----------------|-----------------|-----------------|-----------------|-----------------|-----------------|-----------------|-----------------|-----------------|
| 200           | 1.99E+20        | 2.94E+29        | 2.10E+18        | 2.16E+17        | 6.58E+20        | 3.56E+19        | 5.02E+29        | 2.42E+13        | 6.80E+26        | 1.46E+14        | 8.45E+14        | 2.19E+19        | 1.80E+17        | 8.91E+27        |
| 220           | 2.69E+19        | 4.70E+27        | 3.92E+17        | 5.46E+16        | 5.82E+19        | 5.58E+18        | 9.05E+27        | 1.37E+13        | 1.99E+25        | 7.20E+13        | 2.66E+14        | 2.75E+18        | 4.20E+16        | 2.16E+26        |
| 240           | 5.01E+18        | 1.48E+26        | 9.50E+16        | 1.71E+16        | 7.60E+18        | 1.17E+18        | 3.14E+26        | 8.39E+12        | 1.03E+24        | 3.93E+13        | 9.98E+13        | 4.80E+17        | 1.23E+16        | 9.63E+24        |
| 260           | 1.19E+18        | 7.79E+24        | 2.83E+16        | 6.32E+15        | 1.34E+18        | 3.09E+17        | 1.80E+25        | 5.48E+12        | 8.33E+22        | 2.32E+13        | 4.31E+13        | 1.08E+17        | 4.29E+15        | 6.82E+23        |
| 280           | 3.44E+17        | 6.19E+23        | 9.91E+15        | 2.66E+15        | 2.99E+17        | 9.74E+16        | 1.54E+24        | 3.76E+12        | 9.54E+21        | 1.46E+13        | 2.07E+13        | 2.98E+16        | 1.72E+15        | 6.98E+22        |
| <b>298.15</b> | <b>1.28E+17</b> | <b>8.28E+22</b> | <b>4.28E+15</b> | <b>1.33E+15</b> | <b>9.05E+16</b> | <b>3.88E+16</b> | <b>2.18E+23</b> | <b>2.76E+12</b> | <b>1.70E+21</b> | <b>1.01E+13</b> | <b>1.15E+13</b> | <b>1.07E+16</b> | <b>8.29E+14</b> | <b>1.14E+22</b> |
| 300           | 1.16E+17        | 6.84E+22        | 3.95E+15        | 1.25E+15        | 8.08E+16        | 3.55E+16        | 1.81E+23        | 2.68E+12        | 1.44E+21        | 9.72E+12        | 1.09E+13        | 9.67E+15        | 7.73E+14        | 9.59E+21        |
| 320           | 4.45E+16        | 9.86E+21        | 1.75E+15        | 6.36E+14        | 2.55E+16        | 1.46E+16        | 2.75E+22        | 1.98E+12        | 2.74E+20        | 6.74E+12        | 6.14E+12        | 3.58E+15        | 3.81E+14        | 1.67E+21        |
| 340           | 1.90E+16        | 1.77E+21        | 8.50E+14        | 3.49E+14        | 9.15E+15        | 6.58E+15        | 5.19E+21        | 1.51E+12        | 6.29E+19        | 4.84E+12        | 3.68E+12        | 1.48E+15        | 2.02E+14        | 3.56E+20        |
| 360           | 8.83E+15        | 3.83E+20        | 4.44E+14        | 2.03E+14        | 3.65E+15        | 3.23E+15        | 1.17E+21        | 1.17E+12        | 1.69E+19        | 3.58E+12        | 2.32E+12        | 6.70E+14        | 1.14E+14        | 8.94E+19        |
| 380           | 4.43E+15        | 9.66E+19        | 2.47E+14        | 1.25E+14        | 1.60E+15        | 1.70E+15        | 3.07E+20        | 9.33E+11        | 5.17E+18        | 2.72E+12        | 1.53E+12        | 3.28E+14        | 6.83E+13        | 2.58E+19        |
| 400           | 2.37E+15        | 2.78E+19        | 1.45E+14        | 7.98E+13        | 7.55E+14        | 9.46E+14        | 9.16E+19        | 7.54E+11        | 1.78E+18        | 2.11E+12        | 1.04E+12        | 1.71E+14        | 4.27E+13        | 8.39E+18        |

**Table S5C** The lifetimes of AF+NO<sub>3</sub> abstraction reactions according to the rate constants at 200-400K

| T(K)          | $\tau_8$ (s)    | $\tau_9$ (s)    | $\tau_{10}$ (s) | $\tau_{11}$ (s) | $\tau_{12}$ (s) |
|---------------|-----------------|-----------------|-----------------|-----------------|-----------------|
| 200           | 3.10E+23        | 2.06E+23        | 5.72E+22        | 8.74E+14        | 2.24E+20        |
| 220           | 9.79E+21        | 5.45E+21        | 1.62E+21        | 1.97E+14        | 1.02E+19        |
| 240           | 5.42E+20        | 2.60E+20        | 8.14E+19        | 5.61E+13        | 7.60E+17        |
| 260           | 4.62E+19        | 1.96E+19        | 6.41E+18        | 1.91E+13        | 8.36E+16        |
| 280           | 5.53E+18        | 2.11E+18        | 7.18E+17        | 7.51E+12        | 1.25E+16        |
| <b>298.15</b> | <b>1.02E+18</b> | <b>3.58E+17</b> | <b>1.26E+17</b> | <b>3.56E+12</b> | <b>2.75E+15</b> |
| 300           | 8.71E+17        | 3.02E+17        | 1.07E+17        | 3.31E+12        | 2.38E+15        |
| 320           | 1.71E+17        | 5.49E+16        | 1.99E+16        | 1.61E+12        | 5.52E+14        |
| 340           | 4.05E+16        | 1.21E+16        | 4.51E+15        | 8.41E+11        | 1.51E+14        |
| 360           | 1.12E+16        | 3.13E+15        | 1.19E+15        | 4.70E+11        | 4.75E+13        |
| 380           | 3.51E+15        | 9.27E+14        | 3.62E+14        | 2.78E+11        | 1.68E+13        |
| 400           | 1.23E+15        | 3.09E+14        | 1.23E+14        | 1.72E+11        | 6.53E+12        |



**Table S6C** The lifetimes of AF+O<sub>3</sub> according to the rate constants at 200-400K

| T(K)          | $\tau_1$ (s)    | $\tau_2$ (s)    | $\tau_3$ (s)    | $\tau_4$ (s)    | $\tau_5$ (s)    | $\tau_6$ (s)    | $\tau_7$ (s)    | $\tau_1$ (s)    | $\tau_2$ (s)    | $\tau_3$ (s)    | $\tau_4$ (s)    | $\tau_5$ (s)    |
|---------------|-----------------|-----------------|-----------------|-----------------|-----------------|-----------------|-----------------|-----------------|-----------------|-----------------|-----------------|-----------------|
| 200           | 9.25E+26        | 1.18E+27        | 3.86E+22        | 1.52E+23        | 4.95E+22        | 4.08E+26        | 3.57E+20        | 4.19E+17        | 5.53E+19        | 3.79E+22        | 6.58E+27        | 2.37E+21        |
| 220           | 7.69E+24        | 9.32E+24        | 7.04E+20        | 2.51E+21        | 8.93E+20        | 3.37E+24        | 1.14E+19        | 2.30E+16        | 2.08E+18        | 7.14E+20        | 3.97E+25        | 6.66E+19        |
| 240           | 1.40E+23        | 1.63E+23        | 2.46E+19        | 8.08E+19        | 3.10E+19        | 6.10E+22        | 6.40E+17        | 2.02E+15        | 1.33E+17        | 2.57E+19        | 5.53E+23        | 3.34E+18        |
| 260           | 4.66E+21        | 5.24E+21        | 1.43E+18        | 4.36E+18        | 1.78E+18        | 2.02E+21        | 5.50E+16        | 2.54E+14        | 1.28E+16        | 1.52E+18        | 1.47E+22        | 2.62E+17        |
| 280           | 2.49E+20        | 2.72E+20        | 1.23E+17        | 3.53E+17        | 1.52E+17        | 1.08E+20        | 6.65E+15        | 4.26E+13        | 1.71E+15        | 1.33E+17        | 6.47E+20        | 2.93E+16        |
| <b>298.15</b> | <b>2.44E+19</b> | <b>2.60E+19</b> | <b>1.75E+16</b> | <b>4.79E+16</b> | <b>2.15E+16</b> | <b>1.05E+19</b> | <b>1.24E+15</b> | <b>1.03E+13</b> | <b>3.44E+14</b> | <b>1.92E+16</b> | <b>5.42E+19</b> | <b>5.12E+15</b> |
| 300           | 1.95E+19        | 2.08E+19        | 1.45E+16        | 3.96E+16        | 1.79E+16        | 8.39E+18        | 1.05E+15        | 8.97E+12        | 2.95E+14        | 1.60E+16        | 4.28E+19        | 4.34E+15        |
| 320           | 2.08E+18        | 2.17E+18        | 2.22E+15        | 5.79E+15        | 2.72E+15        | 8.94E+17        | 2.09E+14        | 2.28E+12        | 6.29E+13        | 2.49E+15        | 3.94E+18        | 8.10E+14        |
| 340           | 2.88E+17        | 2.93E+17        | 4.20E+14        | 1.05E+15        | 5.13E+14        | 1.23E+17        | 4.97E+13        | 6.74E+11        | 1.60E+13        | 4.77E+14        | 4.78E+17        | 1.83E+14        |
| 360           | 4.91E+16        | 4.92E+16        | 9.51E+13        | 2.30E+14        | 1.16E+14        | 2.09E+16        | 1.38E+13        | 2.27E+11        | 4.69E+12        | 1.09E+14        | 7.27E+16        | 4.83E+13        |
| 380           | 1.00E+16        | 9.90E+15        | 2.50E+13        | 5.86E+13        | 3.03E+13        | 4.27E+15        | 4.34E+12        | 8.51E+10        | 1.56E+12        | 2.91E+13        | 1.34E+16        | 1.46E+13        |
| 400           | 2.39E+15        | 2.33E+15        | 7.49E+12        | 1.70E+13        | 9.04E+12        | 1.02E+15        | 1.53E+12        | 3.50E+10        | 5.75E+11        | 8.77E+12        | 2.91E+15        | 4.95E+12        |

**Table S7C** The lifetimes of AF+Cl addition reactions according to the rate constants at 200-400K

| T(K)          | $\tau_1$ (s)    | $\tau_2$ (s)    | $\tau_3$ (s)    | $\tau_4$ (s)    | $\tau_5$ (s)    | $\tau_6$ (s)    | $\tau_7$ (s)    | $\tau_1$ (s)    | $\tau_2$ (s)    | $\tau_3$ (s)    | $\tau_4$ (s)    | $\tau_5$ (s)    | $\tau_6$ (s)    | $\tau_7$ (s)    |
|---------------|-----------------|-----------------|-----------------|-----------------|-----------------|-----------------|-----------------|-----------------|-----------------|-----------------|-----------------|-----------------|-----------------|-----------------|
| 200           | 9.38E+09        | 5.76E+21        | 4.30E+12        | 8.15E+08        | 1.20E+14        | 9.45E+13        | 3.16E+18        | 3.28E+09        | 8.78E+23        | 1.45E+10        | 3.53E+10        | 1.08E+16        | 1.98E+15        | 1.64E+19        |
| 220           | 7.52E+09        | 3.61E+20        | 1.83E+12        | 6.72E+08        | 3.42E+13        | 2.93E+13        | 4.10E+17        | 2.62E+09        | 3.49E+22        | 1.06E+10        | 2.22E+10        | 2.22E+15        | 4.93E+14        | 1.82E+18        |
| 240           | 6.17E+09        | 3.54E+19        | 8.86E+11        | 5.63E+08        | 1.18E+13        | 1.09E+13        | 7.38E+16        | 2.13E+09        | 2.34E+21        | 8.02E+09        | 1.49E+10        | 5.86E+14        | 1.53E+14        | 2.87E+17        |
| 260           | 5.14E+09        | 4.89E+18        | 4.73E+11        | 4.78E+08        | 4.75E+12        | 4.64E+12        | 1.71E+16        | 1.77E+09        | 2.34E+20        | 6.25E+09        | 1.05E+10        | 1.88E+14        | 5.59E+13        | 5.95E+16        |
| 280           | 4.35E+09        | 8.87E+17        | 2.73E+11        | 4.12E+08        | 2.15E+12        | 2.21E+12        | 4.81E+15        | 1.49E+09        | 3.23E+19        | 5.00E+09        | 7.69E+09        | 6.98E+13        | 2.34E+13        | 1.53E+16        |
| <b>298.15</b> | <b>3.79E+09</b> | <b>2.28E+17</b> | <b>1.76E+11</b> | <b>3.62E+08</b> | <b>1.14E+12</b> | <b>1.22E+12</b> | <b>1.75E+15</b> | <b>1.30E+09</b> | <b>6.67E+18</b> | <b>4.15E+09</b> | <b>5.96E+09</b> | <b>3.17E+13</b> | <b>1.16E+13</b> | <b>5.16E+15</b> |
| 300           | 3.73E+09        | 2.00E+17        | 1.68E+11        | 3.58E+08        | 1.07E+12        | 1.15E+12        | 1.59E+15        | 1.28E+09        | 5.74E+18        | 4.08E+09        | 5.81E+09        | 2.94E+13        | 1.09E+13        | 4.65E+15        |
| 320           | 3.24E+09        | 5.39E+16        | 1.09E+11        | 3.14E+08        | 5.78E+11        | 6.46E+11        | 5.98E+14        | 1.10E+09        | 1.25E+18        | 3.38E+09        | 4.51E+09        | 1.36E+13        | 5.52E+12        | 1.63E+15        |
| 340           | 2.83E+09        | 1.68E+16        | 7.39E+10        | 2.78E+08        | 3.33E+11        | 3.85E+11        | 2.51E+14        | 9.64E+08        | 3.26E+17        | 2.85E+09        | 3.58E+09        | 6.89E+12        | 3.01E+12        | 6.41E+14        |
| 360           | 2.50E+09        | 5.94E+15        | 5.20E+10        | 2.48E+08        | 2.02E+11        | 2.42E+11        | 1.15E+14        | 8.49E+08        | 9.76E+16        | 2.43E+09        | 2.90E+09        | 3.73E+12        | 1.75E+12        | 2.78E+14        |
| 380           | 2.22E+09        | 2.33E+15        | 3.77E+10        | 2.22E+08        | 1.29E+11        | 1.58E+11        | 5.69E+13        | 7.53E+08        | 3.30E+16        | 2.09E+09        | 2.39E+09        | 2.14E+12        | 1.07E+12        | 1.31E+14        |
| 400           | 1.99E+09        | 9.95E+14        | 2.81E+10        | 2.00E+08        | 8.53E+10        | 1.07E+11        | 3.01E+13        | 6.72E+08        | 1.24E+16        | 1.82E+09        | 1.99E+09        | 1.29E+12        | 6.81E+11        | 6.61E+13        |

**Table S8C** The lifetimes of AF+Cl abstraction reactions according to the rate constants at 200-400K

| T(K)          | $\tau_8$ (s)    | $\tau_9$ (s)    | $\tau_{10}$ (s) | $\tau_{11}$ (s) | $\tau_{12}$ (s) |
|---------------|-----------------|-----------------|-----------------|-----------------|-----------------|
| 200           | 9.50E+19        | 4.05E+21        | 8.79E+20        | 2.18E+12        | 1.38E+11        |
| 220           | 4.68E+18        | 1.20E+20        | 3.04E+19        | 6.14E+11        | 3.87E+10        |
| 240           | 3.75E+17        | 6.32E+18        | 1.81E+18        | 2.10E+11        | 1.32E+10        |
| 260           | 4.37E+16        | 5.17E+17        | 1.65E+17        | 8.39E+10        | 5.27E+09        |
| 280           | 6.86E+15        | 5.97E+16        | 2.09E+16        | 3.78E+10        | 2.36E+09        |
| <b>298.15</b> | <b>1.57E+15</b> | <b>1.07E+16</b> | <b>4.03E+15</b> | <b>1.99E+10</b> | <b>1.24E+09</b> |
| 300           | 1.36E+15        | 9.11E+15        | 3.45E+15        | 1.87E+10        | 1.17E+09        |
| 320           | 3.29E+14        | 1.74E+15        | 7.08E+14        | 1.01E+10        | 6.27E+08        |
| 340           | 9.32E+13        | 4.02E+14        | 1.74E+14        | 5.76E+09        | 3.59E+08        |
| 360           | 3.02E+13        | 1.09E+14        | 4.95E+13        | 3.49E+09        | 2.17E+08        |
| 380           | 1.09E+13        | 3.34E+13        | 1.60E+13        | 2.22E+09        | 1.38E+08        |
| 400           | 4.36E+12        | 1.15E+13        | 5.76E+12        | 1.47E+09        | 9.09E+07        |

**Table SD** The total lifetimes of AF with different oxidants according to the rate constants at 200-400K

| T(K)   | OH                |            | HO2               |            | NO3               |            | O3                |            | Cl                |            |
|--------|-------------------|------------|-------------------|------------|-------------------|------------|-------------------|------------|-------------------|------------|
|        | 1/ $\tau$ (total) | $\tau$ (s) |
| 200    | 1.08E-07          | 9.28E+06   | 7.02E-25          | 1.43E+24   | 5.05E-14          | 1.98E+13   | 2.41E-18          | 1.04E+19   | 1.74E-09          | 5.74E+08   |
| 220    | 1.49E-07          | 6.71E+06   | 2.62E-23          | 3.82E+22   | 9.58E-14          | 1.04E+13   | 4.40E-17          | 5.90E+17   | 2.17E-09          | 4.61E+08   |
| 240    | 1.99E-07          | 5.04E+06   | 5.43E-22          | 1.84E+21   | 1.73E-13          | 5.79E+12   | 5.05E-16          | 5.35E+16   | 2.68E-09          | 3.73E+08   |
| 260    | 2.56E-07          | 3.90E+06   | 7.19E-21          | 1.39E+20   | 3.02E-13          | 3.32E+12   | 4.03E-15          | 6.94E+15   | 3.31E-09          | 3.02E+08   |
| 280    | 3.23E-07          | 3.10E+06   | 6.68E-20          | 1.50E+19   | 5.17E-13          | 1.93E+12   | 2.43E-14          | 1.20E+15   | 4.11E-09          | 2.43E+08   |
| 298.15 | 3.91E-07          | 2.55E+06   | 3.93E-19          | 2.54E+18   | 8.31E-13          | 1.20E+12   | 1.01E-13          | 2.96E+14   | 5.07E-09          | 1.97E+08   |
| 300    | 3.99E-07          | 2.51E+06   | 4.66E-19          | 2.15E+18   | 8.72E-13          | 1.15E+12   | 1.16E-13          | 2.67E+14   | 5.18E-09          | 1.93E+08   |
| 320    | 4.84E-07          | 2.06E+06   | 2.58E-18          | 3.88E+17   | 1.45E-12          | 6.92E+11   | 4.63E-13          | 6.92E+13   | 6.62E-09          | 1.51E+08   |
| 340    | 5.80E-07          | 1.72E+06   | 1.18E-17          | 8.48E+16   | 2.35E-12          | 4.26E+11   | 1.58E-12          | 2.09E+13   | 8.60E-09          | 1.16E+08   |
| 360    | 6.88E-07          | 1.45E+06   | 4.59E-17          | 2.18E+16   | 3.73E-12          | 2.68E+11   | 4.75E-12          | 7.16E+12   | 1.13E-08          | 8.85E+07   |
| 380    | 8.07E-07          | 1.24E+06   | 1.56E-16          | 6.40E+15   | 5.79E-12          | 1.73E+11   | 1.28E-11          | 2.73E+12   | 1.49E-08          | 6.70E+07   |
| 400    | 9.40E-07          | 1.06E+06   | 4.74E-16          | 2.11E+15   | 8.78E-12          | 1.14E+11   | 3.16E-11          | 1.14E+12   | 1.98E-08          | 5.06E+07   |
